# Supplementary material for: Novel Hybrid Indole-Based Caffeic Acid Amide Derivatives as Potent Free Radical Scavenging Agents: Rational Design, Synthesis, Spectroscopic Characterization, In Silico and In Vitro Investigations
Source: Metabolites. 2023 Jan 17;13(2):141. doi: 10.3390/metabo13020141 (PMC9966950; doi:10.3390/metabo13020141)
Supplement: Supplementary file 1 [file metabolites-13-00141-s001.zip › metabolites-2124504-supplementary.pdf]

## Supplementary Material

### **Chemical Reagents, Purification, and Instrumentation**

In a summary, all *reagents* and *solvents* were utilized *with no additional* purification. <sup>1</sup>H NMR data were obtained using Varian 400 MHz spectrometer (Varian Medical Systems, Inc., Palo Alto, CA, USA), with chemical shifts being determined in parts per million (ppm) and coupling constants in Hz. The high-resolution electrospray ionization mass spectrometry (HR-ESIMS) data were evaluated utilizing a JMS-700 mass spectrometer (Jeol, Japan) or by HR-ESIMS data obtained via a G2 QTOF mass spectrometer. Reaction monitoring was performed using TLC on 0.25 mm silica plates (E. Merck; silica gel 60 F<sub>254</sub>). To verify the purity of the final target hybrids a reverse-phase high-performance liquid chromatography (RP-HPLC) was used and equipped with an ultraviolet (UV) detector set at 254 nm. The employed mobile phases were: (A) H<sub>2</sub>O containing 0.05% trifluoroacetic acid; and (B) CH<sub>3</sub>CN. HPLC employed a YMC Hydrosphere C<sub>18</sub> (HS-302) column (5-μm particle size, 12-nm pore size) that was 4.6 mm in diameter × 150 mm in size with a flow rate of 1.0 mL/min. The melting points (M.p.) were assessed with a Fisherbrand digital M.p. apparatus.

### **DPPH Assay**

In brief, 100 μL of freshly prepared DPPH reagent (0.1% in methanol) was added to 100 μL of the sample in 96 wells plate (n=6), and the reaction was incubated at 25 °C for 30 min in dark. At the end of incubation time the resulting reduction in DPPH color intensity was calculated at 540 nm. Data are displayed as means ± SD according to the following equation: percentage inhibition=((Average absorbance of blank-average absorbance of the test)/(Average absorbance of blank))\*100. The assay was carried out at Nawah Scientific Center for Research, Cairo, Egypt. The results were noted using a microplate reader FluoStar Omega. Data was analyzed using Microsoft Excel<sup>®</sup> and the EC<sub>50</sub> value was processed using Graph pad Prism 6<sup>®</sup> by converting the concentrations to their logarithmic value and selecting the non-linear inhibitor regression equation (log (inhibitor) vs. normalized response – variable slope equation).

### **ABTS assay**

In brief, 192 mg of ABTS were dissolved in distilled water and moved to a 50 mL volumetric flask then the volume was completed with distilled water. Then, 1 mL of the previous solution was added to 17 μL of 140 mM potassium persulphate and the mixture was left in the dark for 24 hours. A volume of 1 mL of the reaction mixture was completed to 50 mL with methanol to obtain the final ABTS dilution. The freshly prepared ABTS reagent (190 μL) was mixed with 10 μL of the sample/compound in 96 wells plate (n=6), and the reaction was incubated at 25 °C for 30 min in dark. After incubation, the decrease in ABTS color intensity was assessed at 734 nm. Data are displayed as means ± SD according to the following equation: percentage inhibition=((Average

absorbance of blank-average absorbance of the test)/(Average absorbance of blank))\*100. The assay was performed at Nawah Scientific Center for Research, Cairo, Egypt. The results were recorded using microplate reader FluoStar Omega. Data were investigated using Microsoft Excel® and the IC<sub>50</sub> value was calculated using Graph pad Prism 6® by changing the concentrations to their logarithmic value and choosing a non-linear inhibitor regression equation (log (inhibitor) vs. normalized response – variable slope equation).

### **FRAB Assay**

A freshly prepared TPTZ reagent (300 mM acetate buffer (PH = 3.6), 10 mM TPTZ in 40 mM HCl, and 20 mM FeCl<sub>3</sub>, in a ratio of 10:1:1 v/v/v, respectively). The freshly prepared TPTZ reagent (190 µL) was combined with 10 µL of the sample in 96 wells plate (n=3), and the reaction was incubated at 25 °C for 30 min in dark. After incubation, the resulting blue color was assessed at 593 nm. The assay was performed at Nawah Scientific Center for Research, Cairo, Egypt. Data are displayed as means ± SD. The results were noted using a microplate reader FluoStar Omega. The ferric reducing ability of the samples is described as µM TE/mg sample using the linear regression equation extracted from the calibration curve (linear dose-response curve of Trolox, Figure S1).

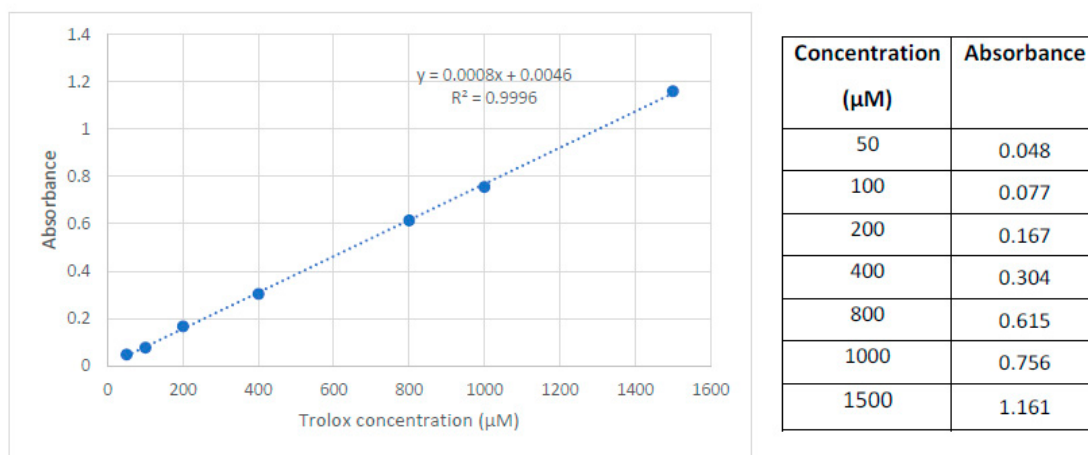

**Dose response line for solutions of Trolox.**

\*The average of the readings of the 3 replicates was taken after subtraction from the Blank  
(FRAP reagent+ solvent)

**Figure S1:** The calibration curve (linear dose-response curve of Trolox) used in FRAP assay

### **ORAC assay**

In brief, 10  $\mu\text{L}$  of the prepared sample(s) were incubated with 30  $\mu\text{L}$  fluoresceine (100 nM) for 10 min at 37 °C. Fluorescence measurement (485 EX, 520 EM, nm) was performed for three cycles (cycle time, 90 sec.) for background measurement. Afterward, 70  $\mu\text{L}$  of freshly prepared 2,2'-Azobis(2-amidinopropane) dihydrochloride (AAPH) (300 mM) were added to each well. Fluorescence measurement (485 EX, 520 EM, nm) was continued for 60 min (40 cycles, each 90 sec.). Data are displayed as means ( $n = 3$ )  $\pm$  SD and the antioxidant effect of the compound/extract was determined as  $\mu\text{M}$  Trolox equivalents by substitution in the linear regression equation:  $y = 3000.2x - 67625$ . The assay was performed at Nawah Scientific Center for Research, Cairo, Egypt. The results were recorded using a microplate reader FluoStar Omega. Results of the samples were given as  $\mu\text{M}$  TE/ mg sample using the linear regression equation extracted from the calibration curve (linear dose-inhibition curve of Trolox, Figure S2).

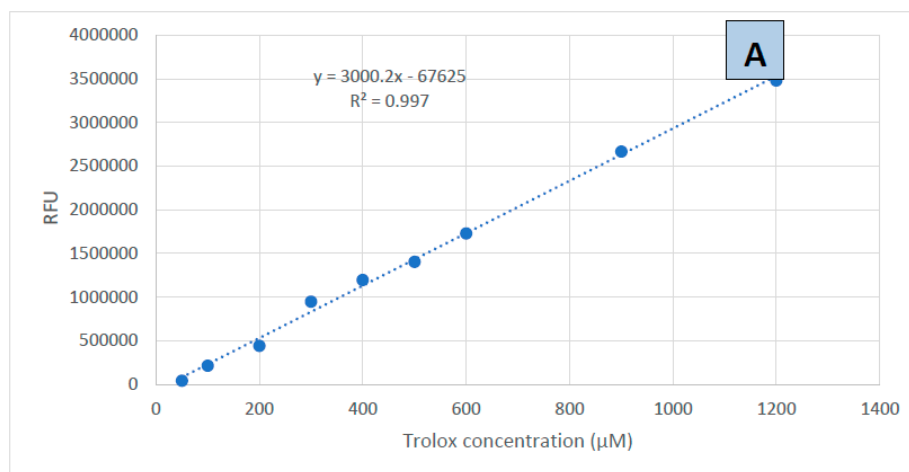

Figure S2. The calibration curve (linear dose-inhibition curve of Trolox) used in ORAC assay

Compound **3a** - ( $^1\text{H}$  NMR,  $^{13}\text{C}$  NMR, HPLC, and HRMS data charts)

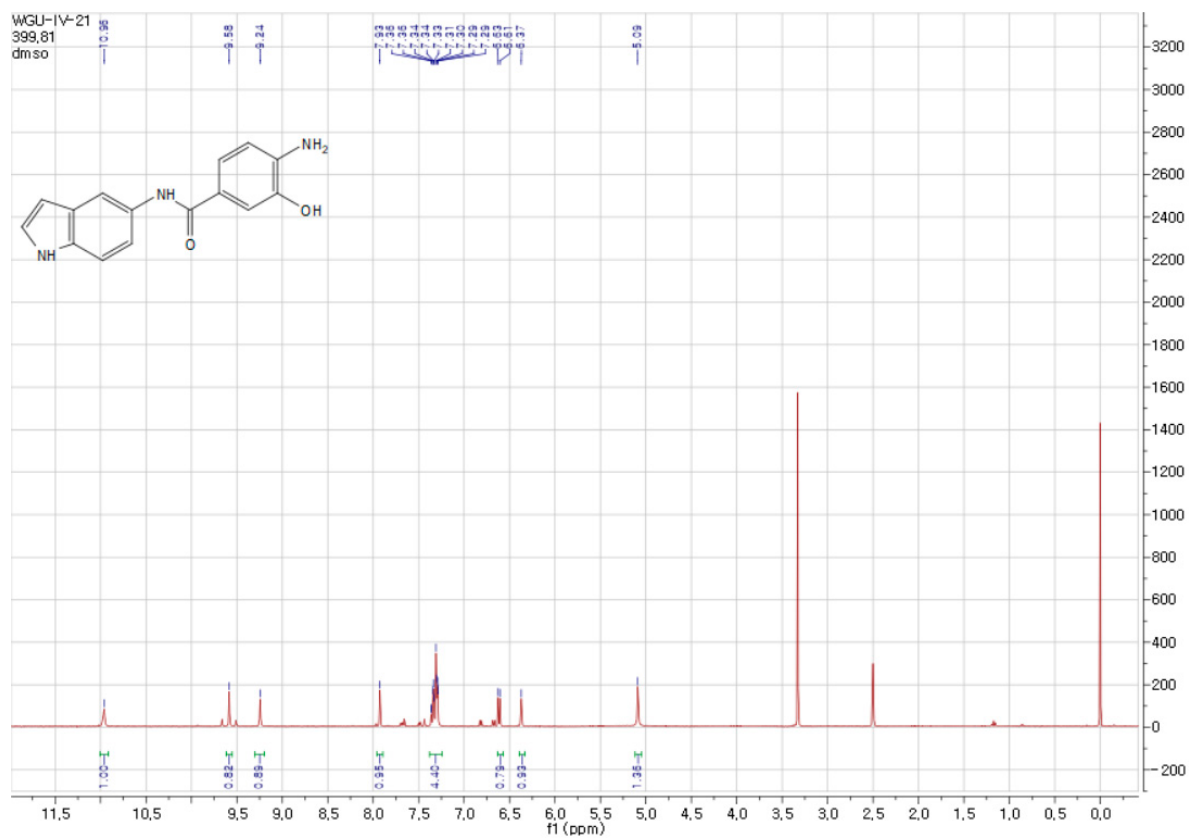

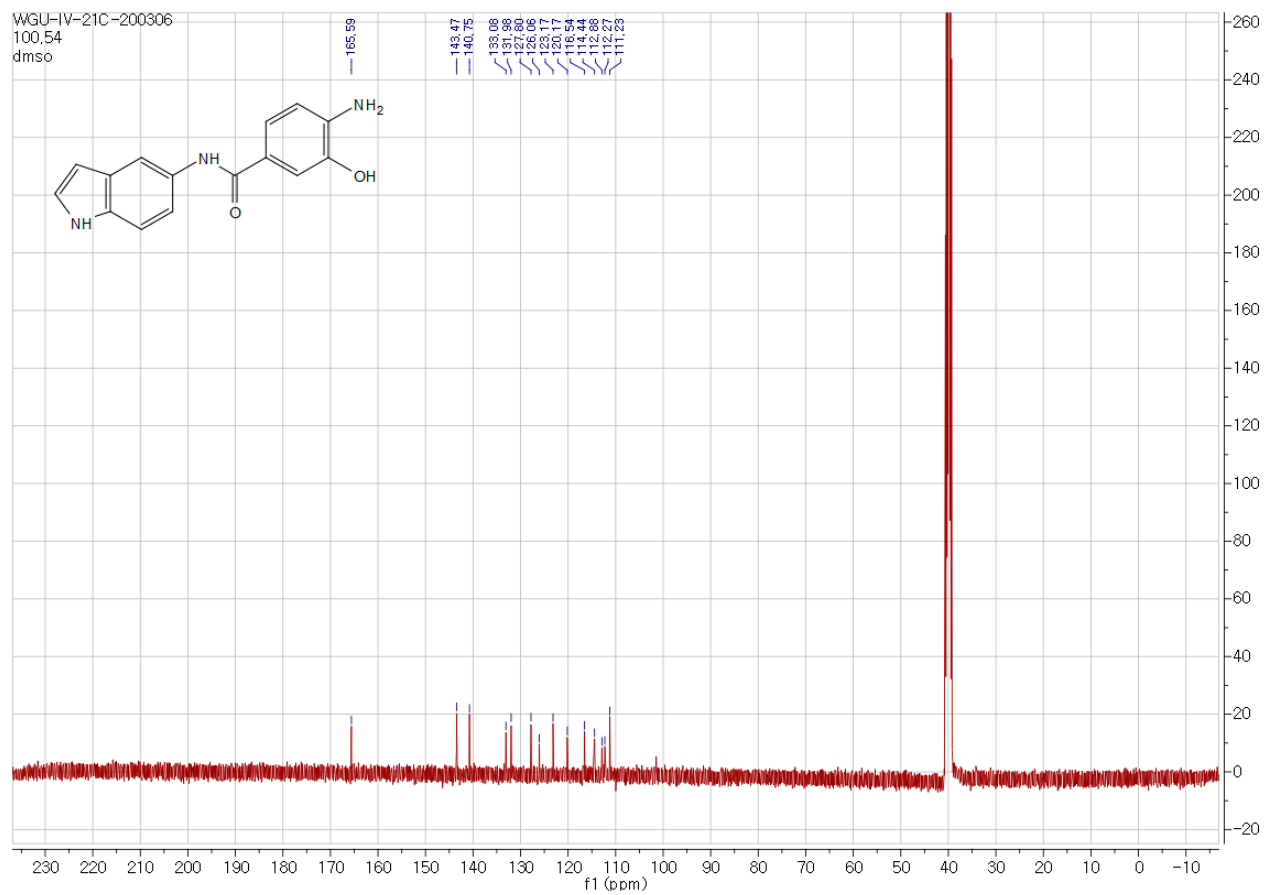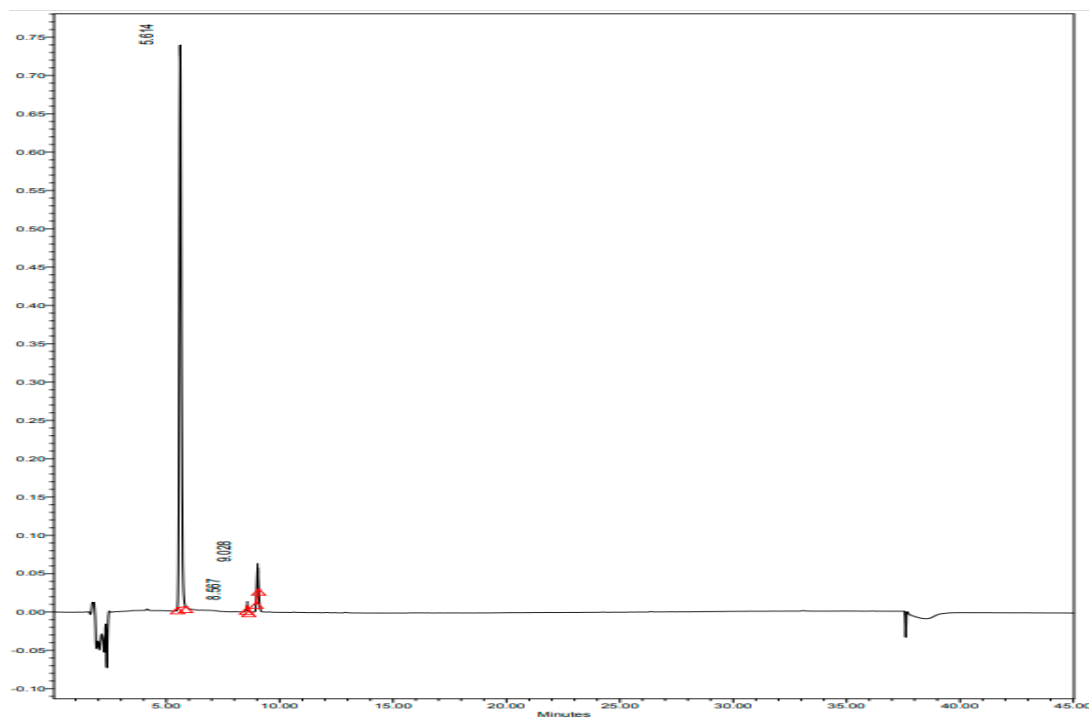

|   | Name | Retention Time (min) | Purity1 Angle | Purity1 Threshold | PDA Match1 Spect. Name | PDA Match1 Angle | PDA Match1 Threshold | PDA Match1 Lib. Name | Area (μV*sec) | % Area | Height (μV) | Int Type | Amount | Units |
|---|------|----------------------|---------------|-------------------|------------------------|------------------|----------------------|----------------------|---------------|--------|-------------|----------|--------|-------|
| 1 |      | 5.614                |               |                   |                        |                  |                      |                      | 4697962       | 96.71  | 732306      | bb       |        |       |
| 2 |      | 8.567                |               |                   |                        |                  |                      |                      | 16715         | 0.34   | 4069        | bb       |        |       |
| 3 |      | 9.028                |               |                   |                        |                  |                      |                      | 142913        | 2.94   | 34542       | bb       |        |       |

WGU-IV-21 95 (1.678)

1: TOF MS ES+  
1.67e4

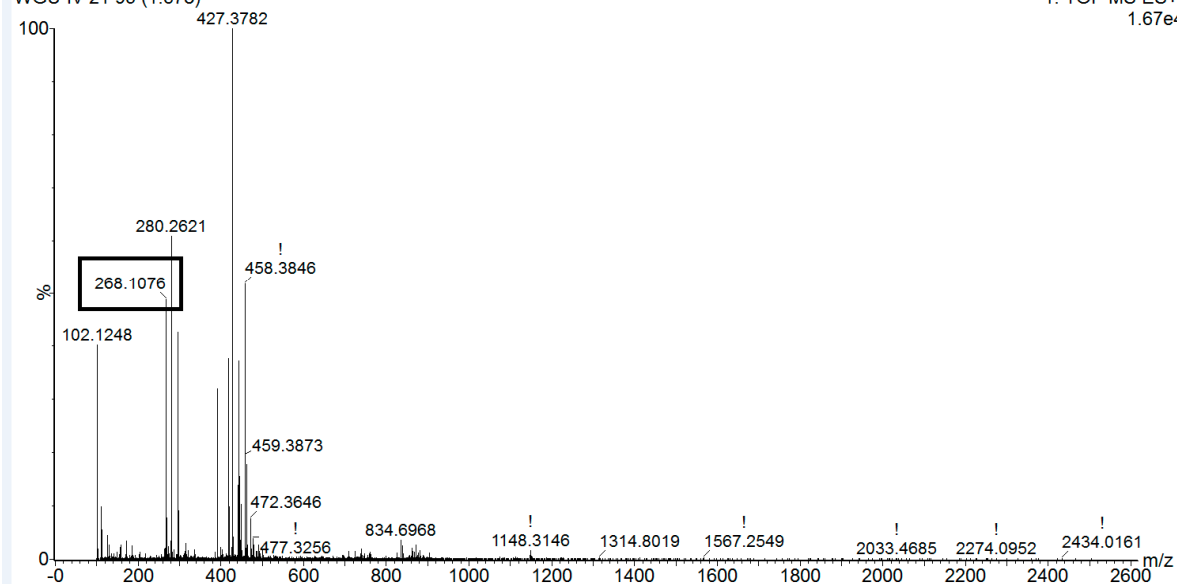

Compound **3b** - (<sup>1</sup>H NMR, <sup>13</sup>C NMR, HPLC, and HRMS original data charts)

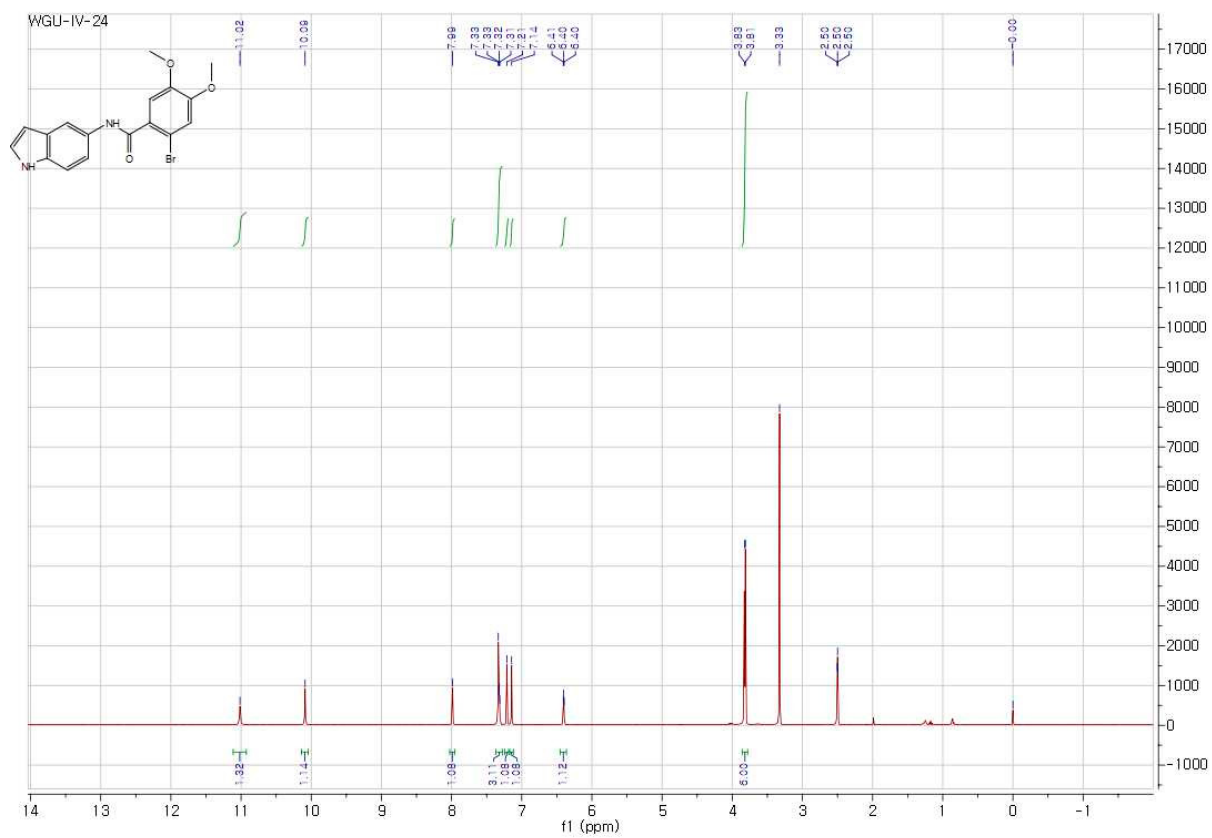

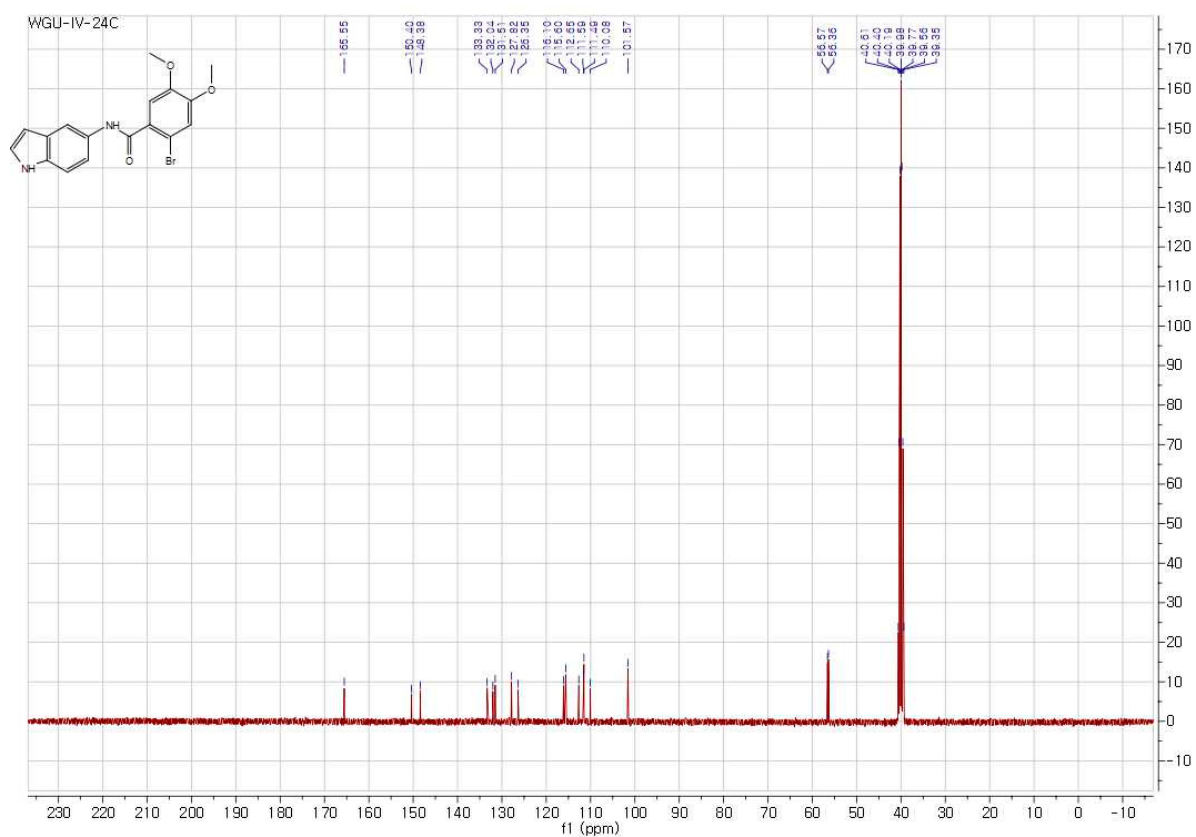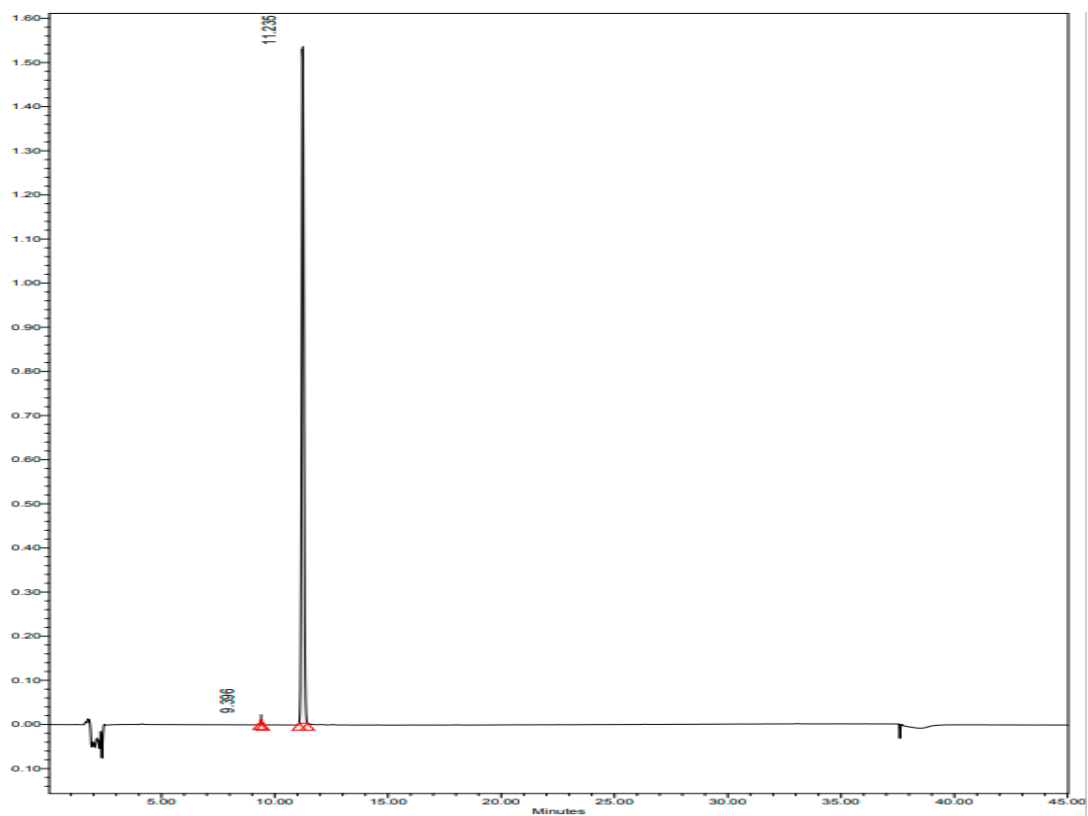

|   | Name | Retention Time (min) | Purity1 Angle | Purity1 Threshold | PDA Match1 Spect. Name | PDA Match1 Angle | PDA Match1 Threshold | PDA Match1 Lib. Name | Area (μV*sec) | % Area | Height (μV) | Int Type | Amount |
|---|------|----------------------|---------------|-------------------|------------------------|------------------|----------------------|----------------------|---------------|--------|-------------|----------|--------|
| 1 |      | 9.396                |               |                   |                        |                  |                      |                      | 27679         | 0.27   | 6663        | bb       |        |
| 2 |      | 11.235               |               |                   |                        |                  |                      |                      | 10377858      | 99.73  | 1536413     | bb       |        |

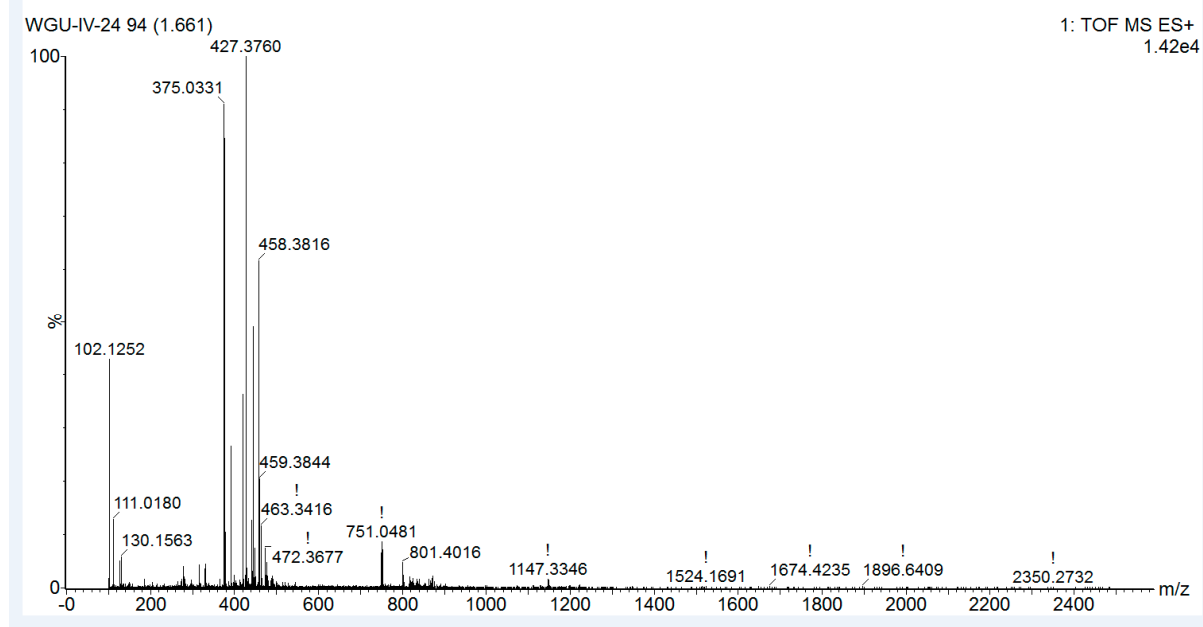

Compound **3c** - ( $^1\text{H}$  NMR,  $^{13}\text{C}$  NMR, HPLC, and HRMS data charts)

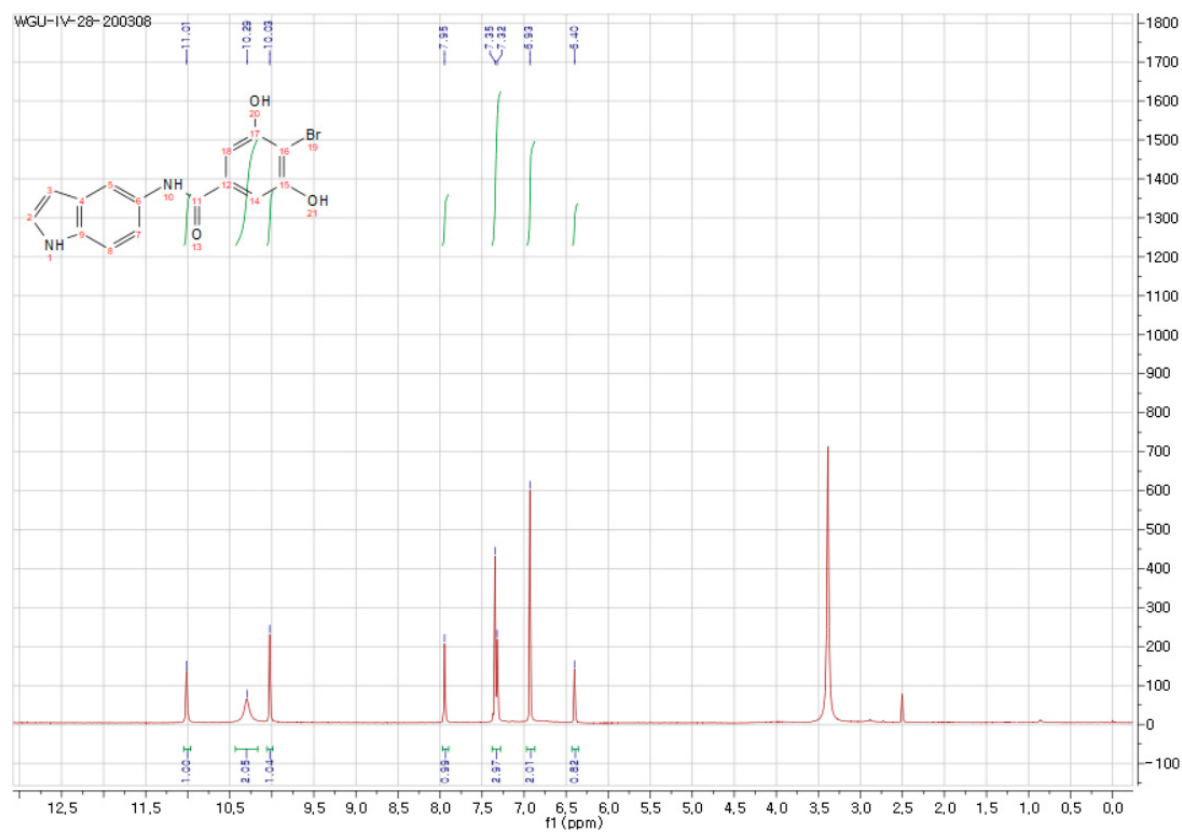

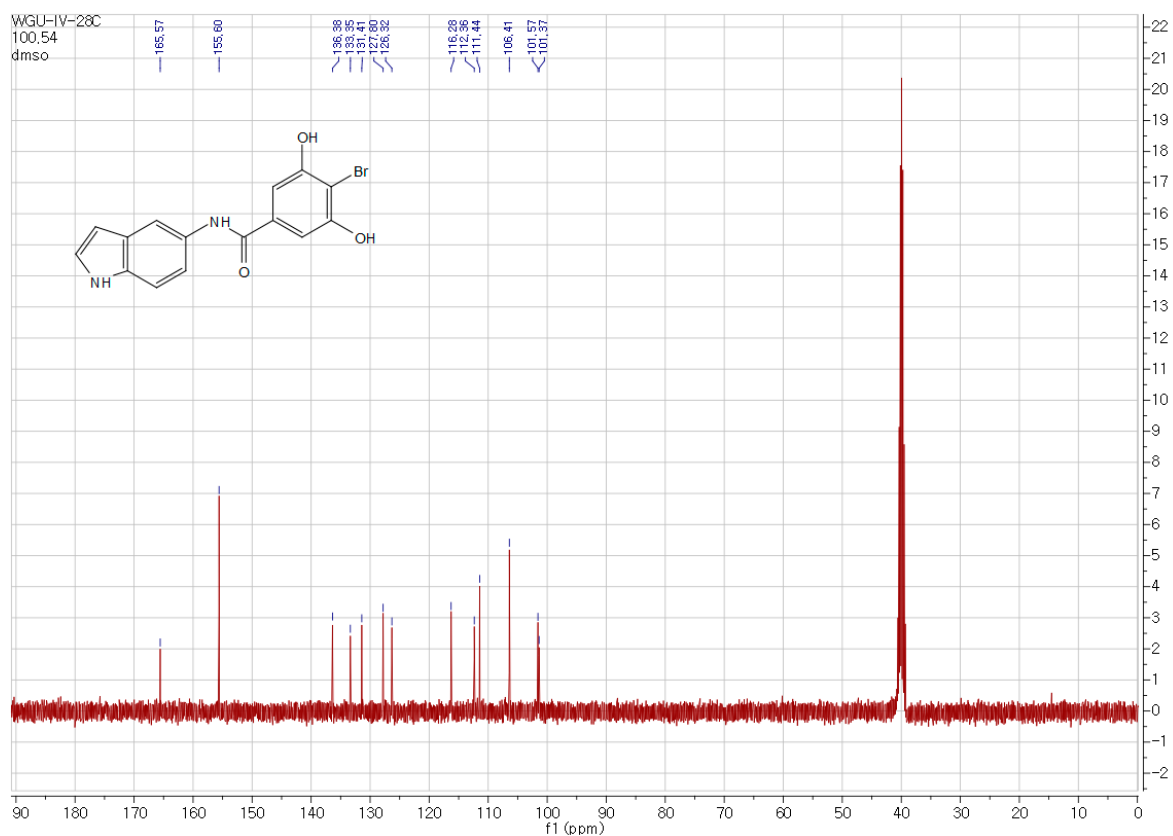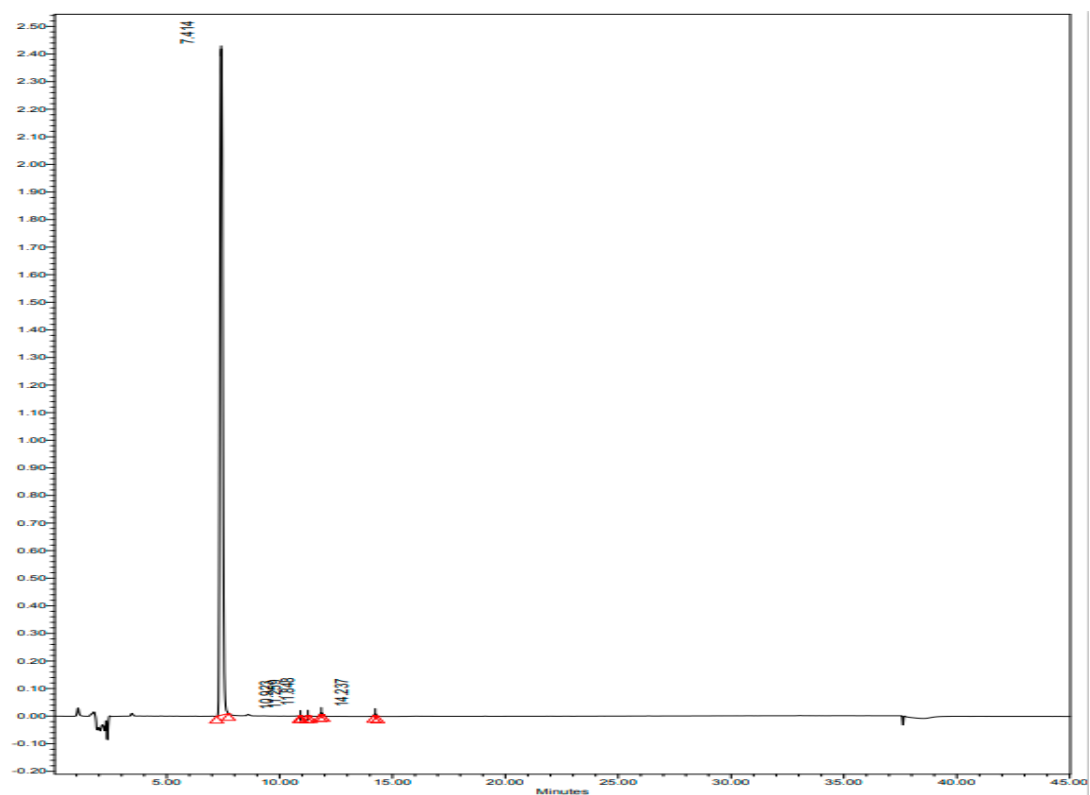

|   | Name | Retention Time (min) | Purity1 Angle | Purity1 Threshold | PDA Match1 Spect. Name | PDA Match1 Angle | PDA Match1 Threshold | PDA Match1 Lib. Name | Area (μV*sec) | % Area | Height (μV) | Int Type | Amount |
|---|------|----------------------|---------------|-------------------|------------------------|------------------|----------------------|----------------------|---------------|--------|-------------|----------|--------|
| 1 |      | 7.414                |               |                   |                        |                  |                      |                      | 21479454      | 99.60  | 2437268     | bb       |        |
| 2 |      | 10.923               |               |                   |                        |                  |                      |                      | 567           | 0.00   | 295         | bb       |        |
| 3 |      | 11.259               |               |                   |                        |                  |                      |                      | 10194         | 0.05   | 1921        | bb       |        |
| 4 |      | 11.848               |               |                   |                        |                  |                      |                      | 35220         | 0.16   | 7485        | bb       |        |
| 5 |      | 14.237               |               |                   |                        |                  |                      |                      | 39324         | 0.18   | 7328        | bb       |        |

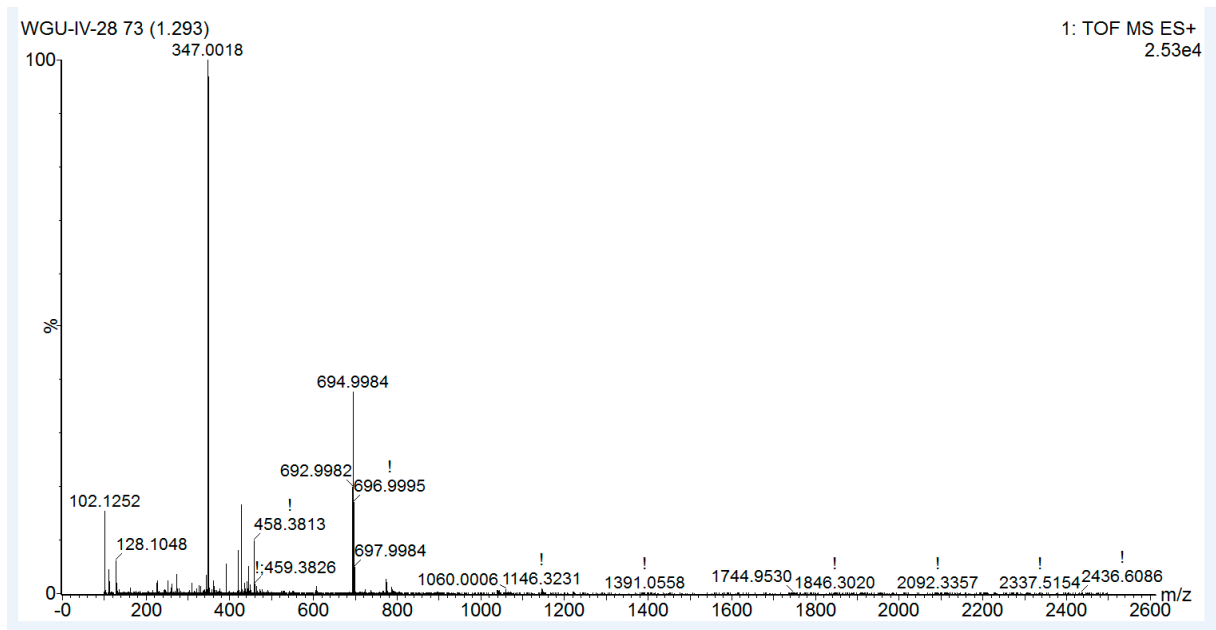

Compound **3d** - ( $^1\text{H}$  NMR,  $^{13}\text{C}$  NMR, HPLC, and HRMS data charts)

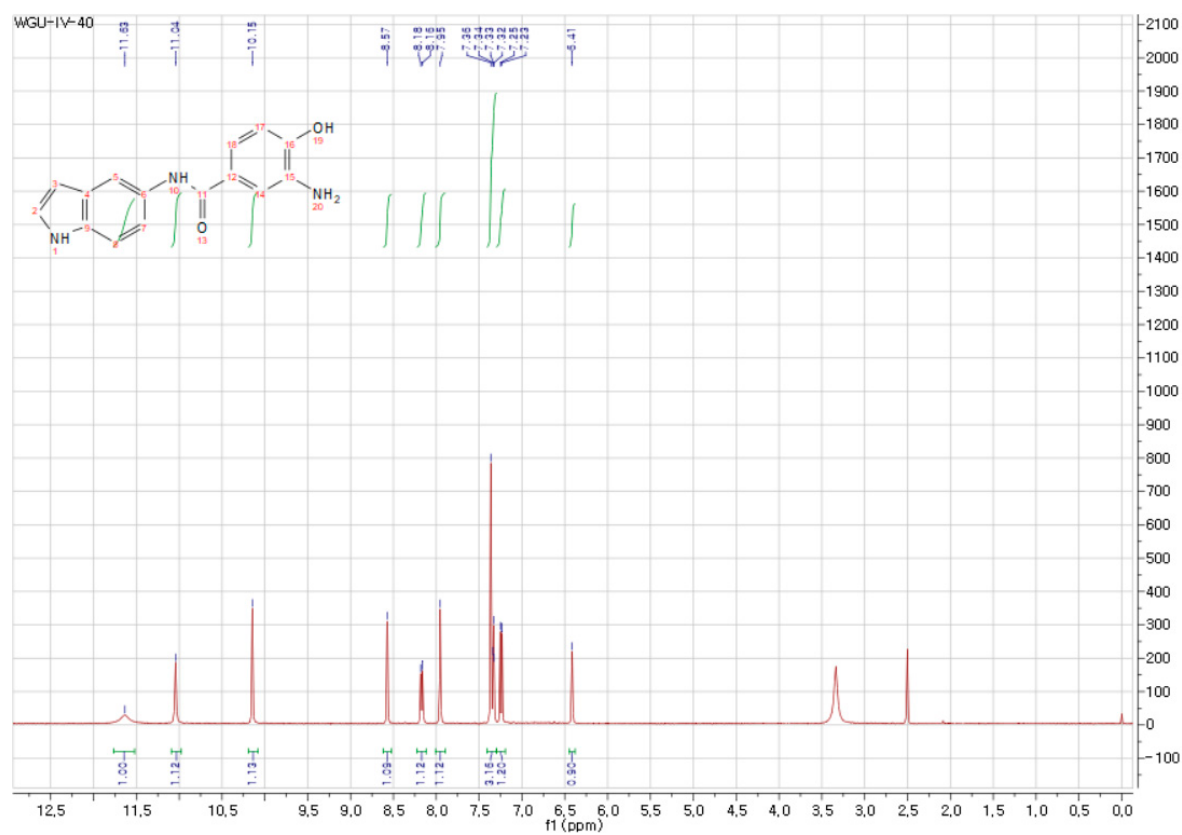

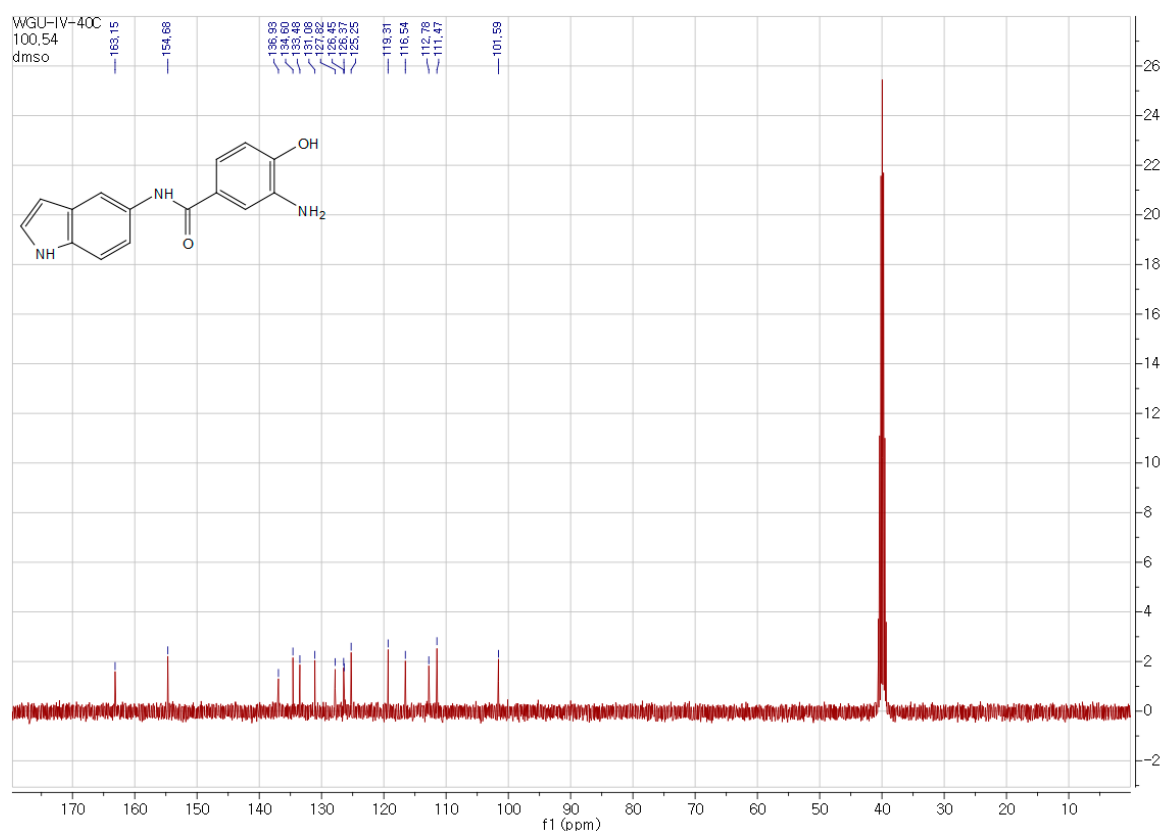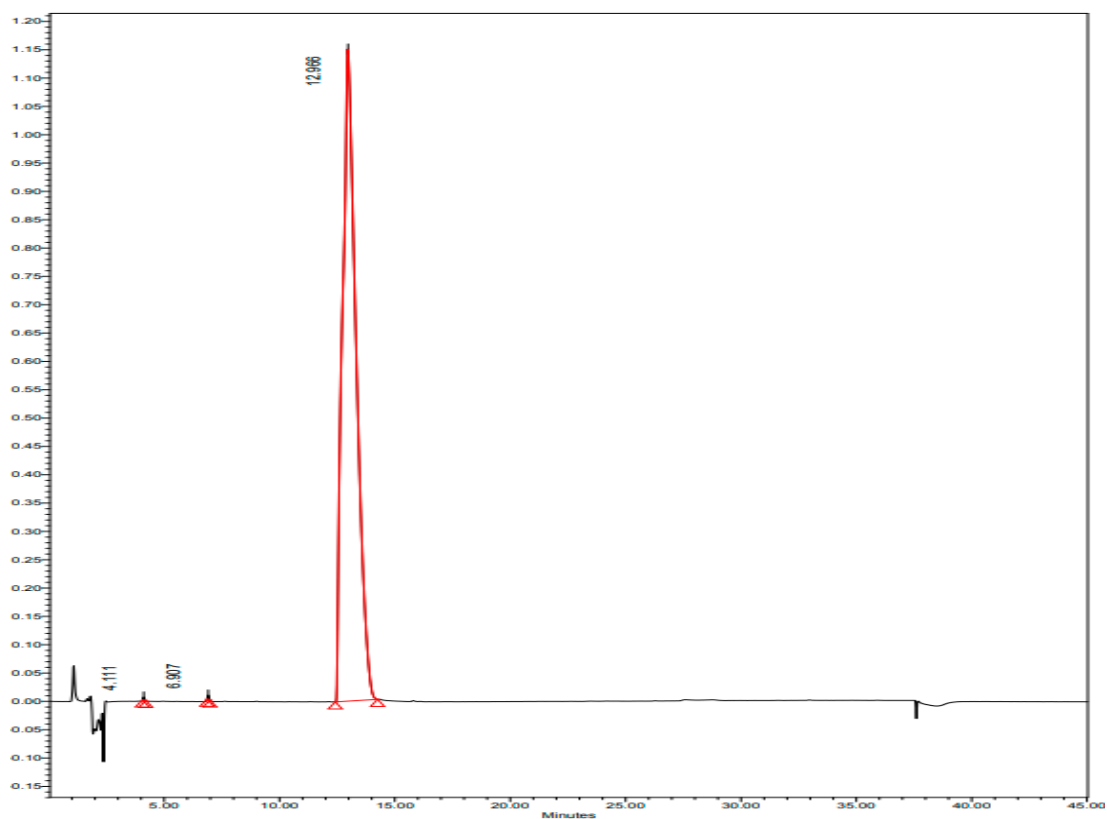

|   | Name | Retention Time (min) | Purity1 Angle | Purity1 Threshold | PDA Match1 Spect. Name | PDA Match1 Angle | PDA Match1 Threshold | PDA Match1 Lib. Name | Area (μV*sec) | % Area | Height (μV) | Int Type | Amount |
|---|------|----------------------|---------------|-------------------|------------------------|------------------|----------------------|----------------------|---------------|--------|-------------|----------|--------|
| 1 |      | 4.111                |               |                   |                        |                  |                      |                      | 28208         | 0.06   | 5651        | bb       |        |
| 2 |      | 6.907                |               |                   |                        |                  |                      |                      | 36475         | 0.08   | 7958        | bb       |        |
| 3 |      | 12.966               |               |                   |                        |                  |                      |                      | 47974942      | 99.87  | 1150830     | bb       |        |

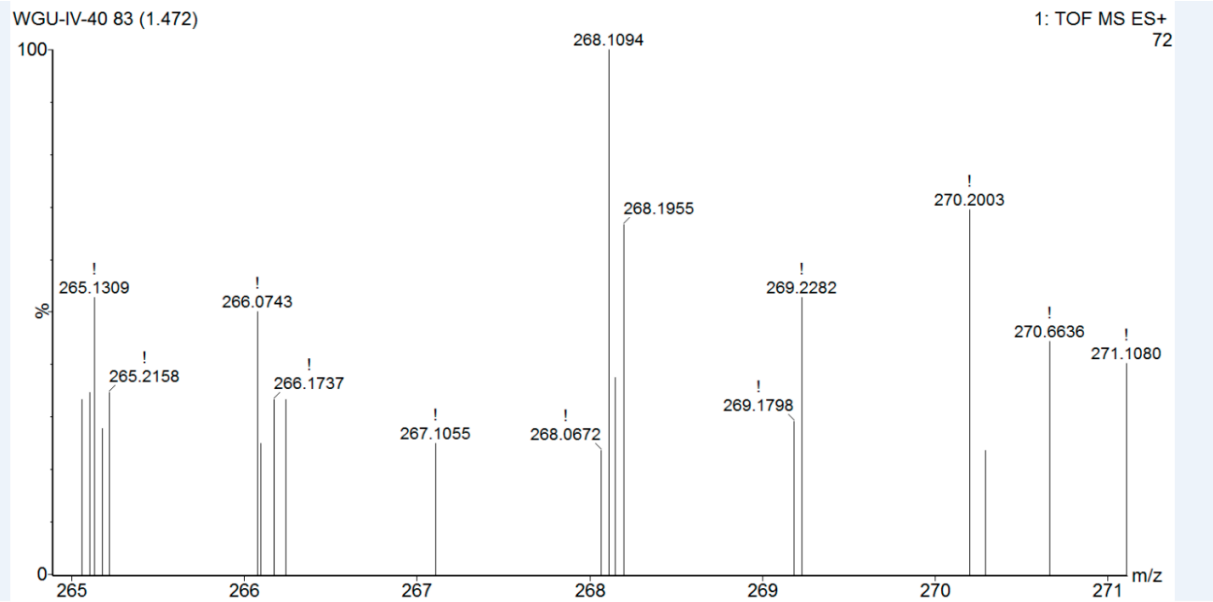

Compound **3e** - ( $^1\text{H}$  NMR,  $^{13}\text{C}$  NMR, HPLC, and HRMS data charts)

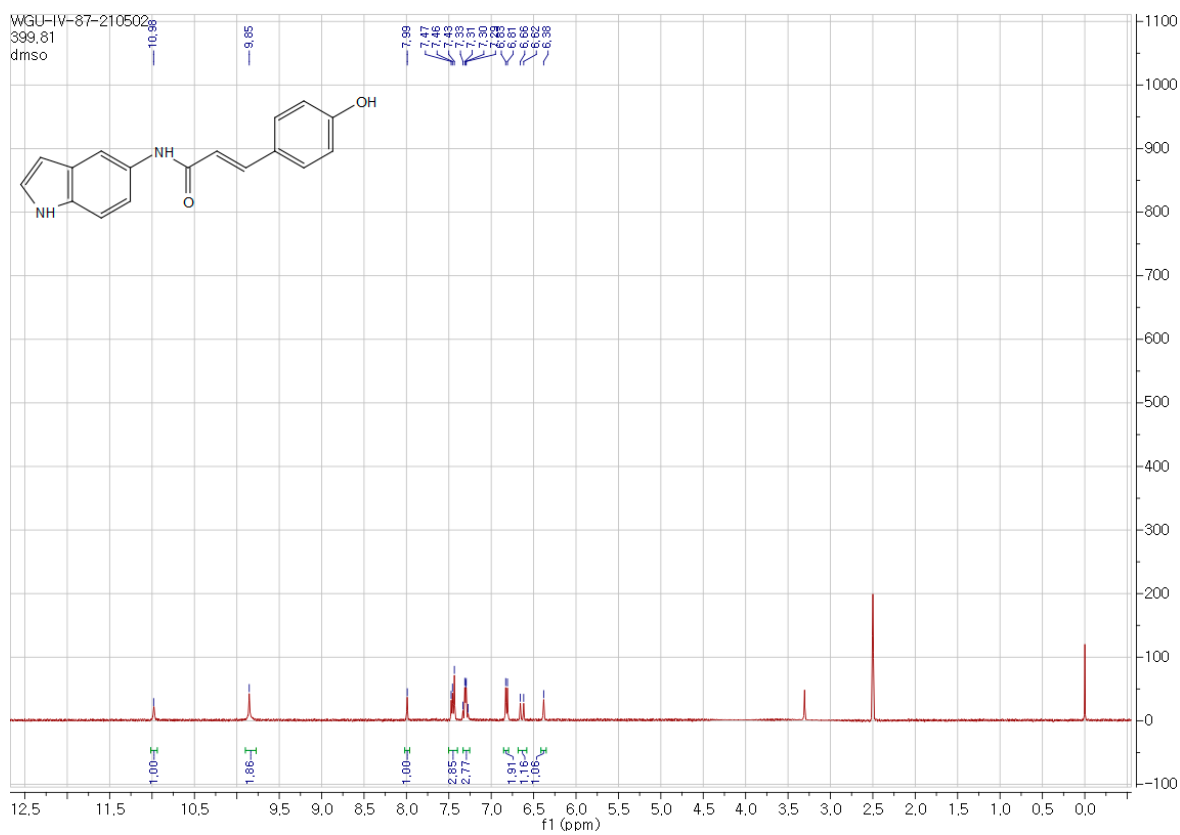

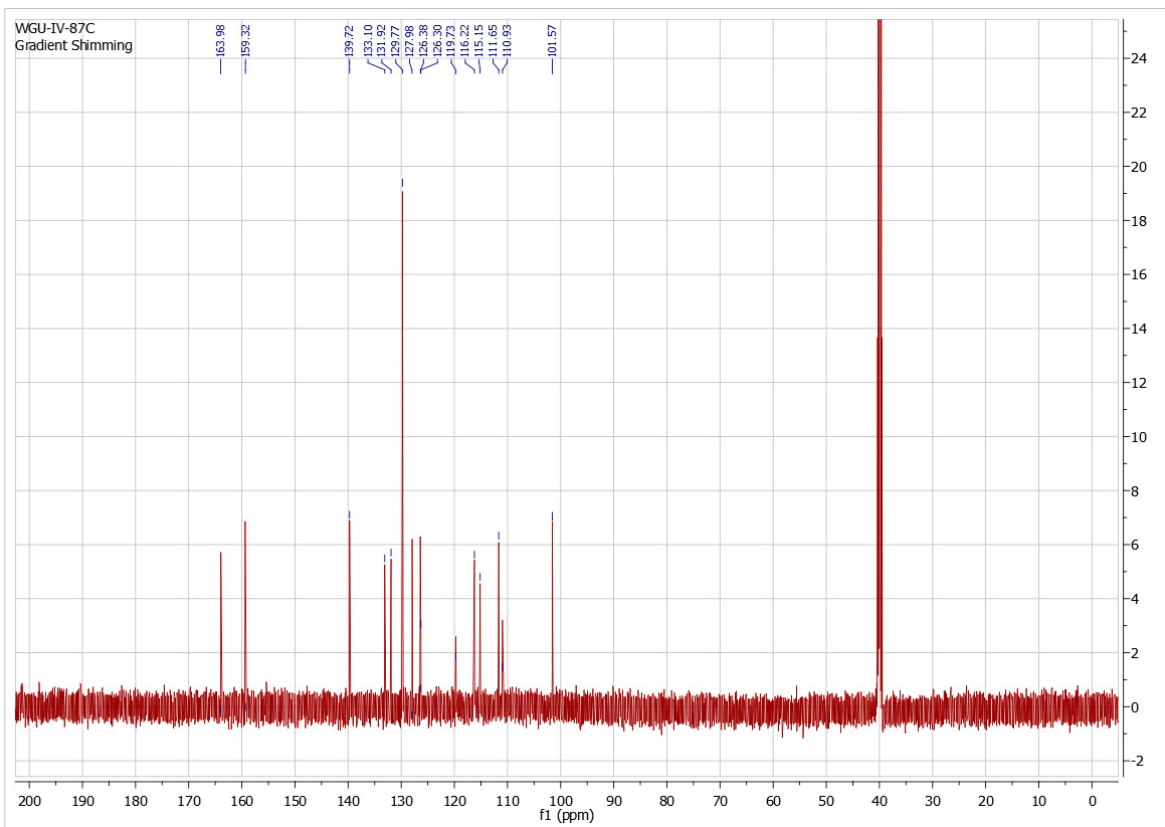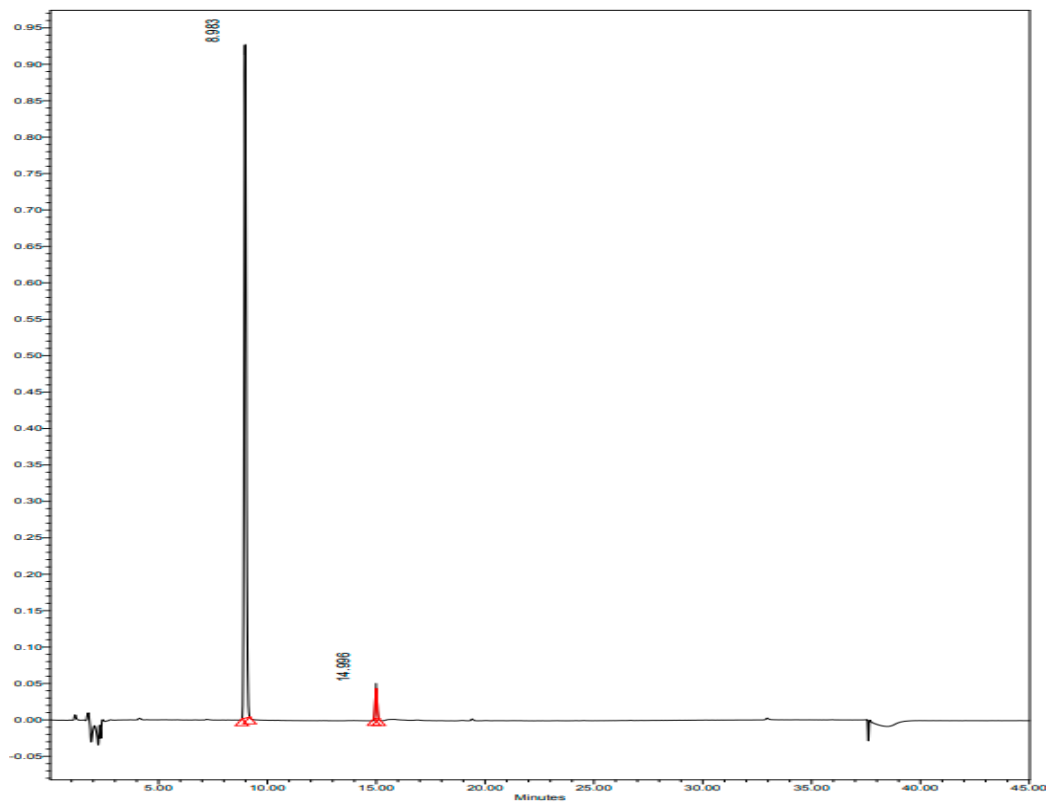

|   | Name | Retention Time (min) | Purity1 Angle | Purity1 Threshold | PDA Match1 Spect. Name | PDA Match1 Angle | PDA Match1 Threshold | PDA Match1 Lib. Name | Area (μV*sec) | % Area | Height (μV) | Int Type | Amount | Units |
|---|------|----------------------|---------------|-------------------|------------------------|------------------|----------------------|----------------------|---------------|--------|-------------|----------|--------|-------|
| 1 |      | 8.983                |               |                   |                        |                  |                      |                      | 6278950       | 96.06  | 920318      | bb       |        |       |
| 2 |      | 14.996               |               |                   |                        |                  |                      |                      | 257420        | 3.94   | 41613       | bb       |        |       |

WGU-IV-87 68 (1.207)

1: TOF MS ES+

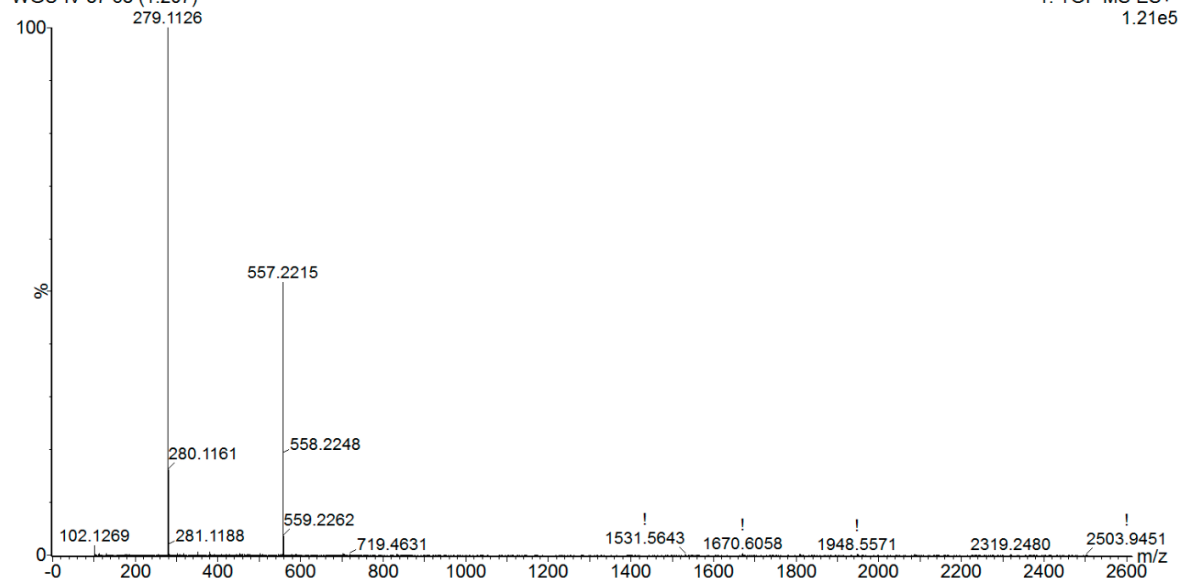

Monoisotopic Mass, Even Electron Ions

399 formula(e) evaluated with 8 results within limits (all results (up to 1000) for each mass)

Elements Used:

C: 0-500 H: 0-1000 N: 0-10 O: 0-20

WGU-IV-87 68 (1.207)

1: TOF MS ES+

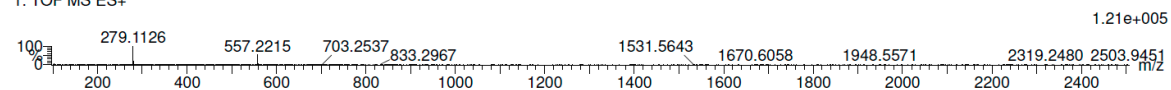

Minimum: -1.5  
Maximum: 5.0 10.0 50.0

| Mass     | Calc. Mass | mDa  | PPM   | DBE  | i-FIT | Norm   | Conf (%) | Formula       |
|----------|------------|------|-------|------|-------|--------|----------|---------------|
| 279.1126 | 279.1134   | -0.8 | -2.9  | 11.5 | 124.7 | 0.485  | 61.55    | C17 H15 N2 O2 |
|          | 279.1093   | 3.3  | 11.8  | 7.5  | 125.4 | 1.162  | 31.30    | C12 H15 N4 O4 |
|          | 279.1107   | 1.9  | 6.8   | 12.5 | 126.9 | 2.690  | 6.79     | C13 H11 N8    |
|          | 279.1080   | 4.6  | 16.5  | 2.5  | 130.1 | 5.910  | 0.27     | C11 H19 O8    |
|          | 279.1174   | -4.8 | -17.2 | 15.5 | 131.4 | 7.127  | 0.08     | C22 H15       |
|          | 279.1165   | -3.9 | -14.0 | 3.5  | 133.9 | 9.697  | 0.01     | C6 H15 N8 O5  |
|          | 279.1152   | -2.6 | -9.3  | -1.5 | 134.1 | 9.911  | 0.00     | C5 H19 N4 O9  |
|          | 279.1125   | 0.1  | 0.4   | -0.5 | 138.5 | 14.274 | 0.00     | C H15 N10 O7  |

Compound **3f** - ( $^1\text{H}$  NMR,  $^{13}\text{C}$  NMR, HPLC, and HRMS data charts)

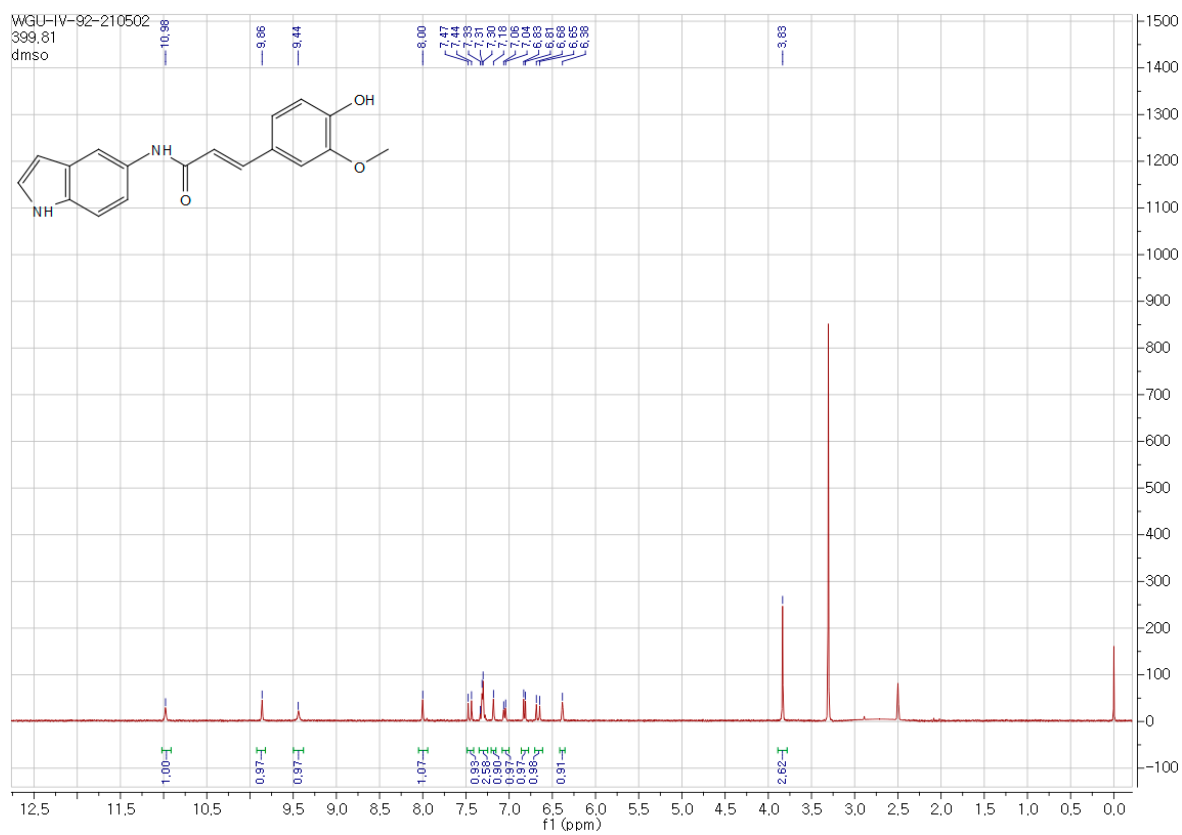

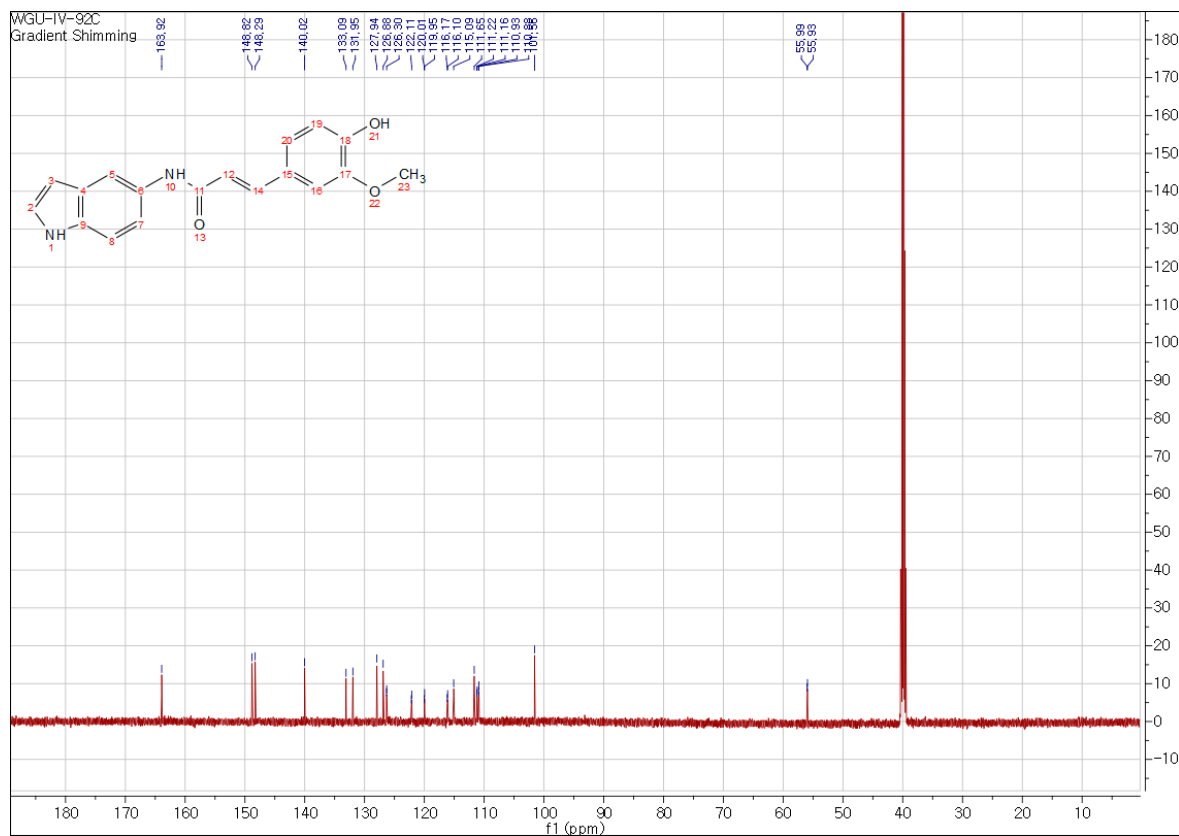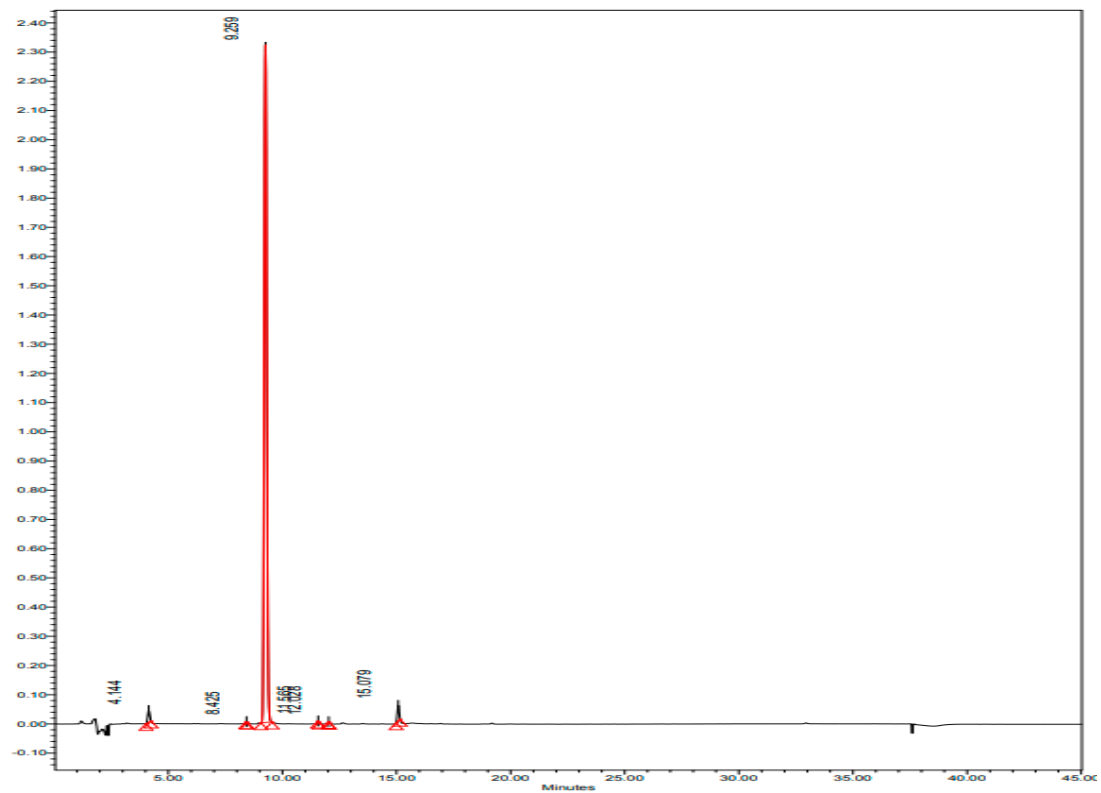

|   | Name | Retention Time (min) | Purity1 Angle | Purity1 Threshold | PDA Match1 Spect. Name | PDA Match1 Angle | PDA Match1 Threshold | PDA Match1 Lib. Name | Area (μV*sec) | % Area | Height (μV) | Int Type | Amount |
|---|------|----------------------|---------------|-------------------|------------------------|------------------|----------------------|----------------------|---------------|--------|-------------|----------|--------|
| 1 |      | 4.144                |               |                   |                        |                  |                      |                      | 253536        | 1.32   | 39912       | bb       |        |
| 2 |      | 8.425                |               |                   |                        |                  |                      |                      | 4607          | 0.02   | 1835        | bb       |        |
| 3 |      | 9.259                |               |                   |                        |                  |                      |                      | 18631137      | 97.06  | 2328181     | bb       |        |
| 4 |      | 11.565               |               |                   |                        |                  |                      |                      | 5300          | 0.03   | 1811        | bb       |        |
| 5 |      | 12.028               |               |                   |                        |                  |                      |                      | 1556          | 0.01   | 863         | bb       |        |
| 6 |      | 15.079               |               |                   |                        |                  |                      |                      | 298883        | 1.56   | 52927       | bb       |        |

WGU-IV-92 76 (1.344)  
309.1234

1: TOF MS ES+  
9.21e4

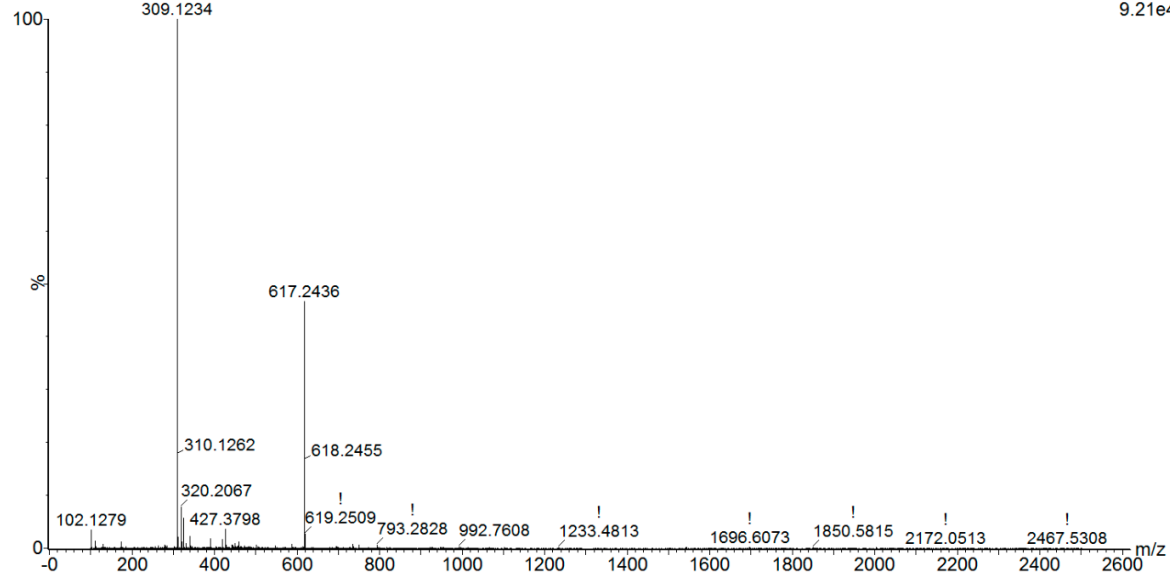

Monoisotopic Mass, Even Electron Ions  
483 formula(e) evaluated with 8 results within limits (all results (up to 1000) for each mass)  
Elements Used:  
C: 0-500 H: 0-1000 N: 0-10 O: 0-20  
WGU-IV-92 76 (1.344)  
1: TOF MS ES+

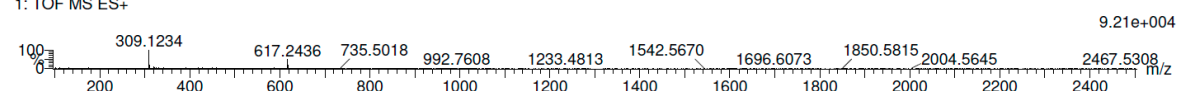

Minimum: -1.5  
Maximum: 5.0 10.0 50.0

| Mass     | Calc. Mass | mDa  | PPM   | DBE  | i-FIT | Norm   | Conf(%) | Formula       |
|----------|------------|------|-------|------|-------|--------|---------|---------------|
| 309.1234 | 309.1212   | 2.2  | 7.1   | 12.5 | 210.8 | 0.239  | 78.76   | C14 H13 N8 O  |
|          | 309.1239   | -0.5 | -1.6  | 11.5 | 212.6 | 2.028  | 13.16   | C18 H17 N2 O3 |
|          | 309.1199   | 3.5  | 11.3  | 7.5  | 213.1 | 2.523  | 8.02    | C13 H17 N4 O5 |
|          | 309.1186   | 4.8  | 15.5  | 2.5  | 218.3 | 7.703  | 0.05    | C12 H21 O9    |
|          | 309.1279   | -4.5 | -14.6 | 15.5 | 219.8 | 9.162  | 0.01    | C23 H17 O     |
|          | 309.1271   | -3.7 | -12.0 | 3.5  | 220.3 | 9.691  | 0.01    | C7 H17 N8 O6  |
|          | 309.1258   | -2.4 | -7.8  | -1.5 | 220.5 | 9.933  | 0.00    | C6 H21 N4 O10 |
|          | 309.1231   | 0.3  | 1.0   | -0.5 | 224.6 | 14.019 | 0.00    | C2 H17 N10 O8 |

Compound **3g** - ( $^1\text{H}$  NMR,  $^{13}\text{C}$  NMR, HPLC, and HRMS data charts)

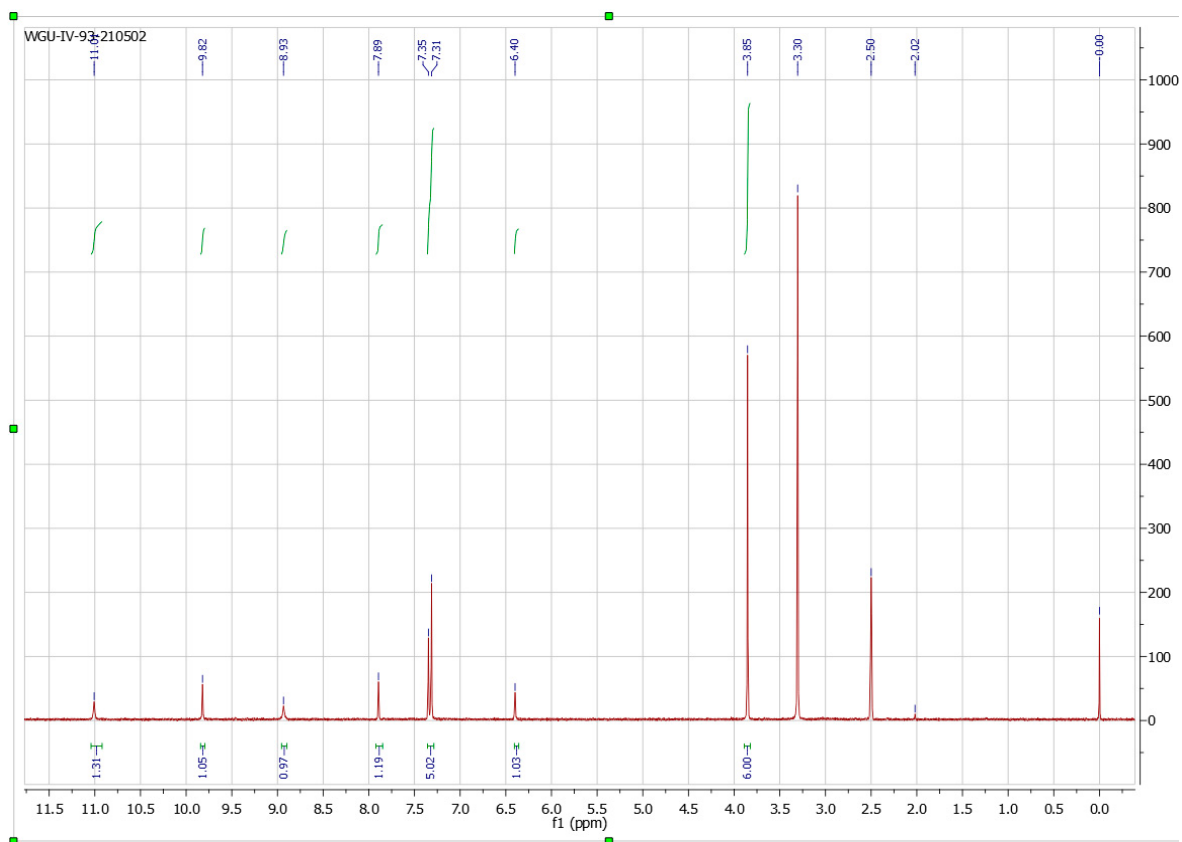

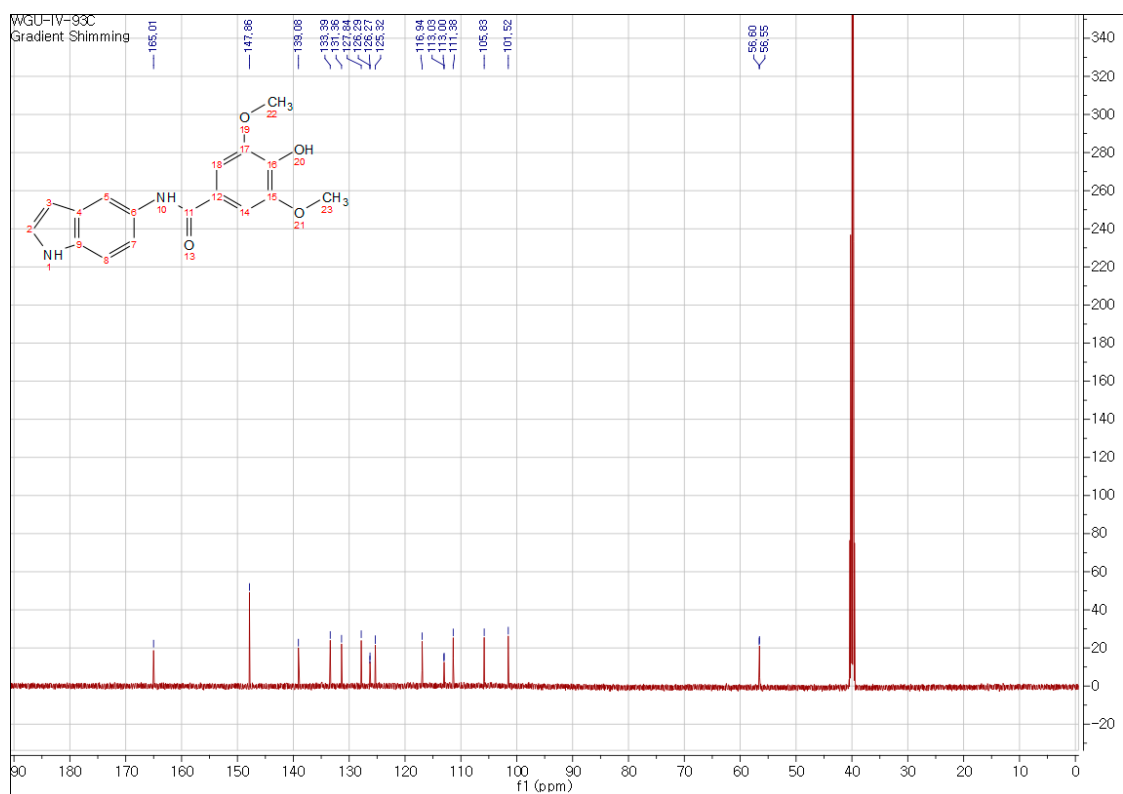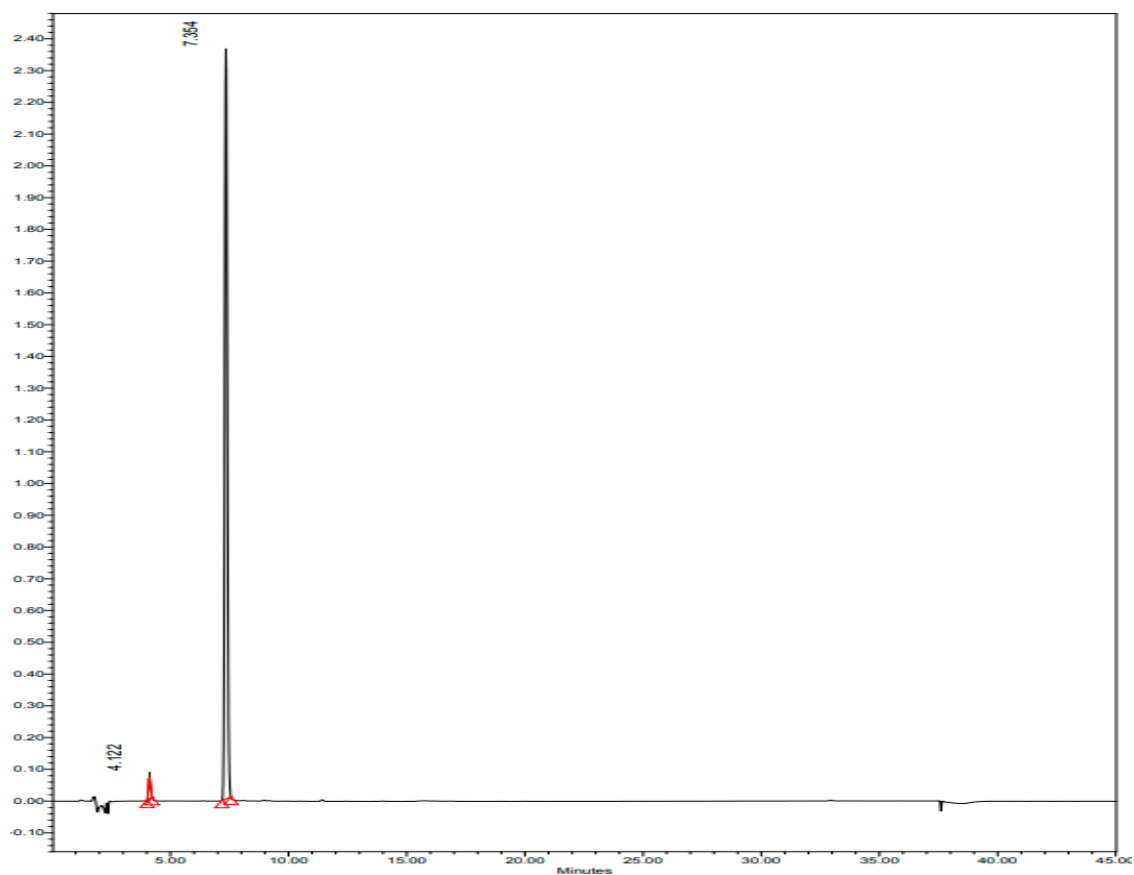

|   | Name | Retention Time (min) | Purity1 Angle | Purity1 Threshold | PDA Match1 Spect. Name | PDA Match1 Angle | PDA Match1 Threshold | PDA Match1 Lib. Name | Area (µV*sec) | % Area | Height (µV) | Int Type | Amount |
|---|------|----------------------|---------------|-------------------|------------------------|------------------|----------------------|----------------------|---------------|--------|-------------|----------|--------|
| 1 |      | 4.122                |               |                   |                        |                  |                      |                      | 437452        | 2.36   | 66851       | bb       |        |
| 2 |      | 7.354                |               |                   |                        |                  |                      |                      | 18098341      | 97.64  | 2358265     | bb       |        |

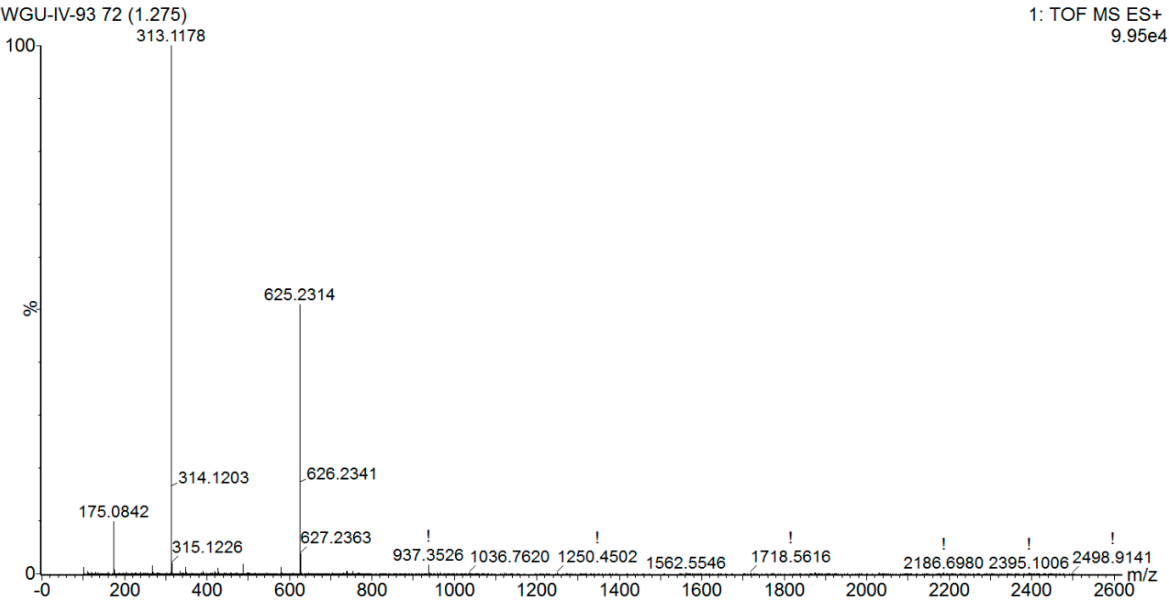

Monoisotopic Mass, Even Electron Ions  
496 formula(e) evaluated with 7 results within limits (all results (up to 1000) for each mass)  
Elements Used:  
C: 0-500 H: 0-1000 N: 0-10 O: 0-20  
WGU-IV-93 72 (1.275)  
1: TOF MS ES+

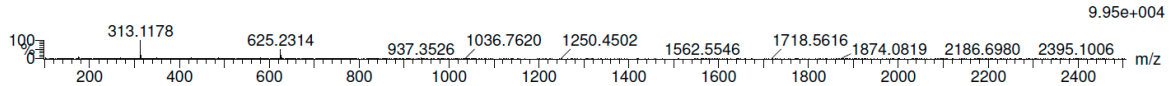

|          |            |      |       |      |       |        |         |               |
|----------|------------|------|-------|------|-------|--------|---------|---------------|
| Minimum: |            |      |       | -1.5 |       |        |         |               |
| Maximum: |            | 5.0  | 10.0  | 50.0 |       |        |         |               |
| Mass     | Calc. Mass | mDa  | PPM   | DBE  | i-FIT | Norm   | Conf(%) | Formula       |
| 313.1178 | 313.1161   | 1.7  | 5.4   | 11.5 | 143.5 | 0.069  | 93.32   | C13 H13 N8 O2 |
|          | 313.1148   | 3.0  | 9.6   | 6.5  | 146.2 | 2.741  | 6.45    | C12 H17 N4 O6 |
|          | 313.1188   | -1.0 | -3.2  | 10.5 | 149.8 | 6.371  | 0.17    | C17 H17 N2 O4 |
|          | 313.1202   | -2.4 | -7.7  | 15.5 | 151.2 | 7.686  | 0.05    | C18 H13 N6    |
|          | 313.1135   | 4.3  | 13.7  | 1.5  | 152.5 | 9.043  | 0.01    | C11 H21 O10   |
|          | 313.1220   | -4.2 | -13.4 | 2.5  | 153.9 | 10.392 | 0.00    | C6 H17 N8 O7  |
|          | 313.1180   | -0.2 | -0.6  | -1.5 | 160.0 | 16.504 | 0.00    | C H17 N10 O9  |

Compound **3h** - ( $^1\text{H}$  NMR,  $^{13}\text{C}$  NMR, HPLC, and HRMS data charts)

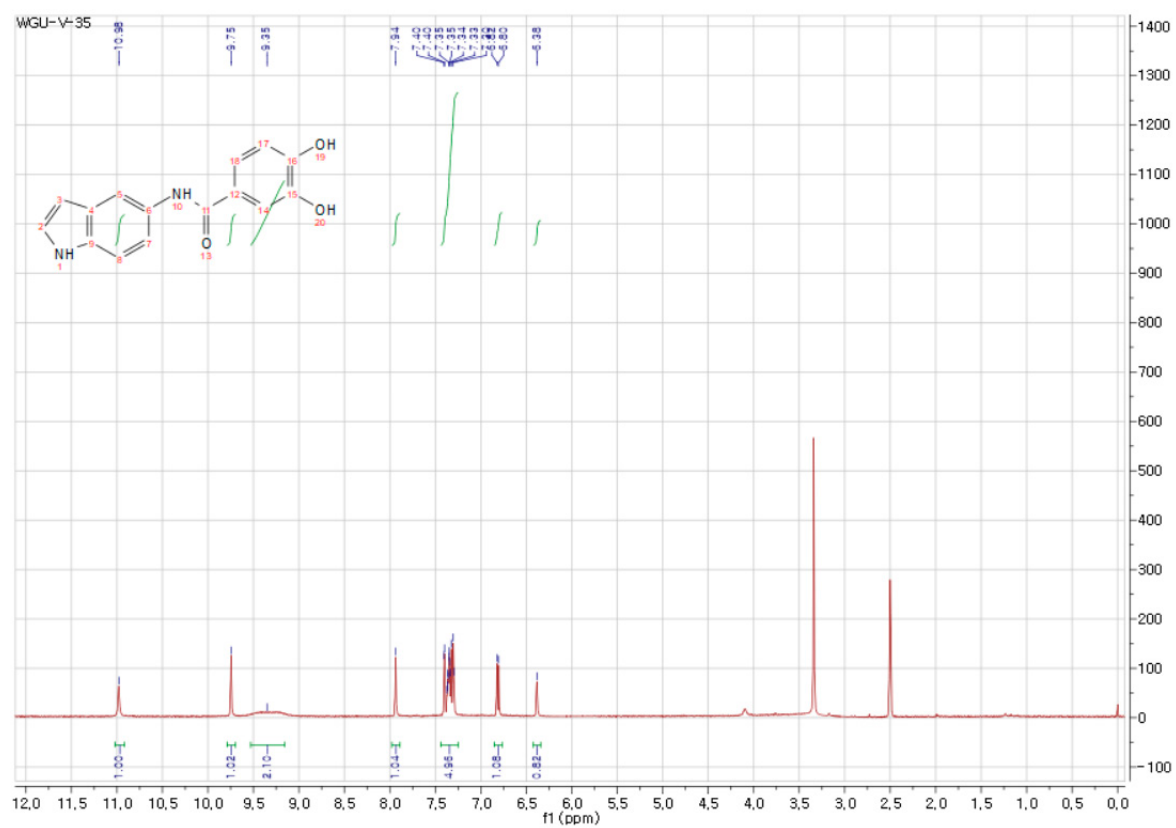

WGU-IV-95C  
Gradient Shimming

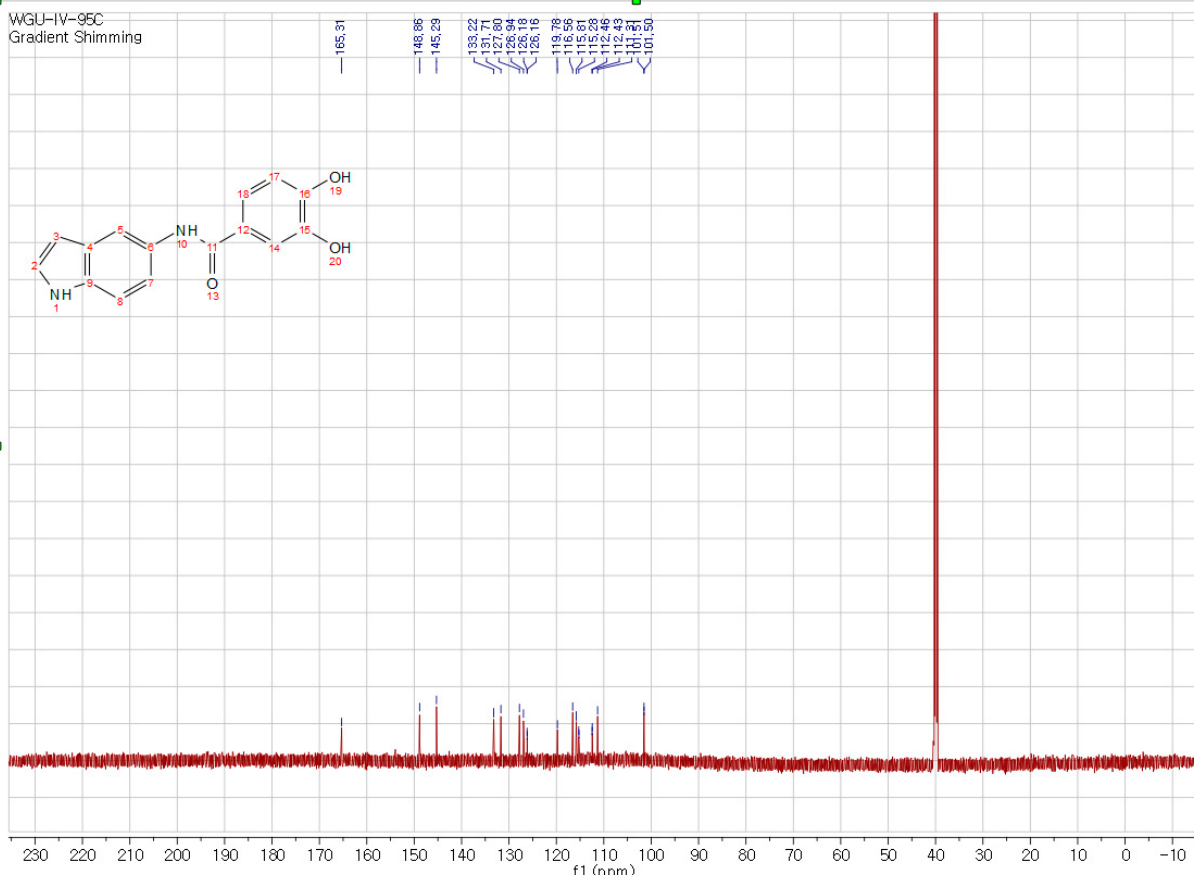

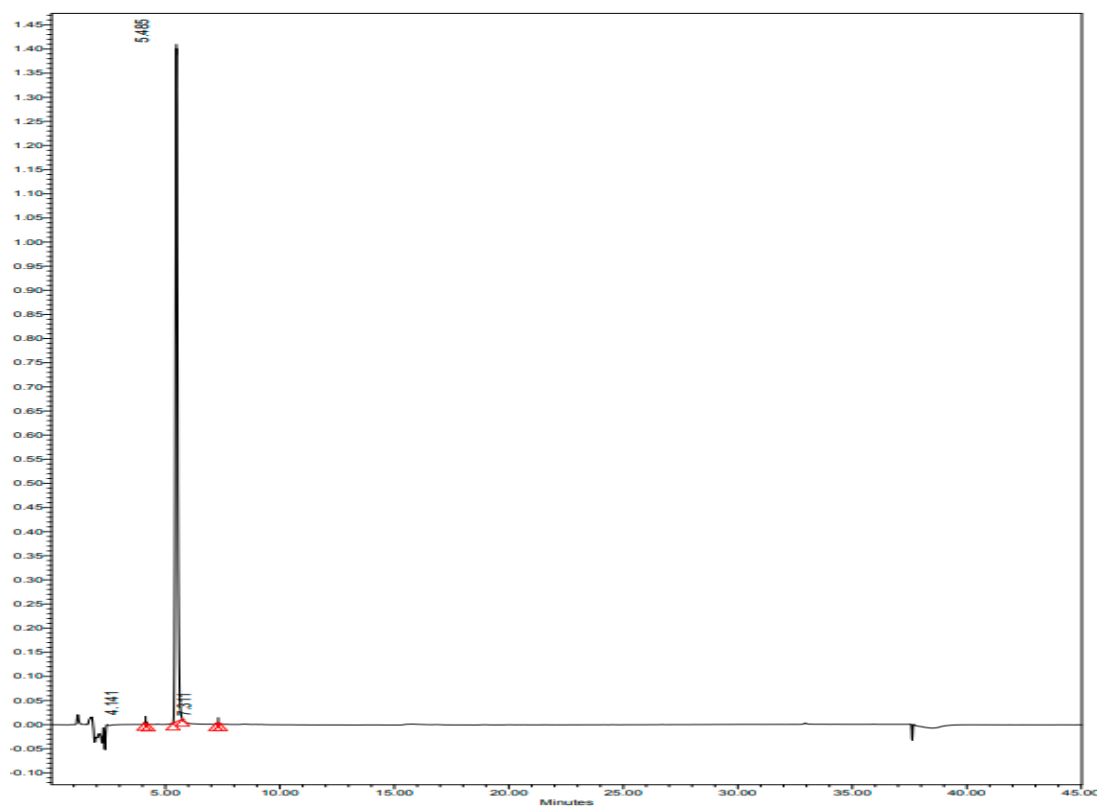

|   | Name | Retention Time (min) | Purity1 Angle | Purity1 Threshold | PDA Match1 Spect. Name | PDA Match1 Angle | PDA Match1 Threshold | PDA Match1 Lib. Name | Area (μV*sec) | % Area | Height (μV) | Int Type | Amount |
|---|------|----------------------|---------------|-------------------|------------------------|------------------|----------------------|----------------------|---------------|--------|-------------|----------|--------|
| 1 |      | 4.141                |               |                   |                        |                  |                      |                      | 28544         | 0.30   | 4740        | bb       |        |
| 2 |      | 5.485                |               |                   |                        |                  |                      |                      | 9351070       | 99.53  | 1387600     | bb       |        |
| 3 |      | 7.311                |               |                   |                        |                  |                      |                      | 15301         | 0.16   | 1925        | bb       |        |

WGU-IV-95 84 (1.489)

1: TOF MS ES+  
7.53e4

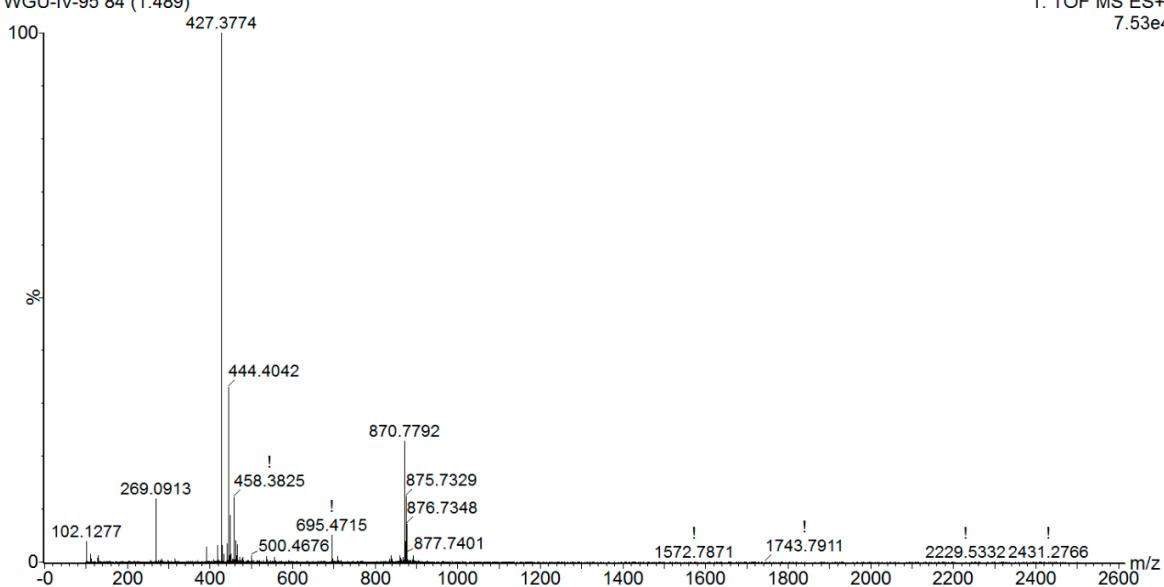

Monoisotopic Mass, Even Electron Ions

375 formula(e) evaluated with 5 results within limits (all results (up to 1000) for each mass)

Elements Used:

C: 0-500 H: 0-1000 N: 0-10 O: 0-20

WGU-IV-95 84 (1.489)

1: TOF MS ES+

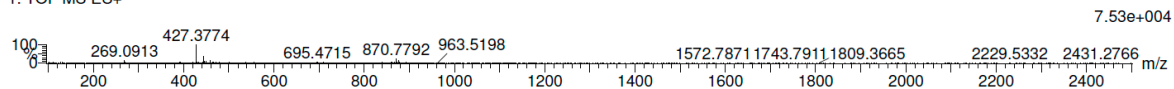

Minimum:

Maximum:

5.0 10.0 -1.5  
50.0

| Mass     | Calc. Mass | mDa  | PPM   | DBE  | i-FIT | Norm  | Conf(%) | Formula       |
|----------|------------|------|-------|------|-------|-------|---------|---------------|
| 269.0913 | 269.0926   | -1.3 | -4.8  | 10.5 | 117.2 | 0.235 | 79.04   | C15 H13 N2 O3 |
|          | 269.0899   | 1.4  | 5.2   | 11.5 | 118.7 | 1.729 | 17.75   | C11 H9 N8 O   |
|          | 269.0886   | 2.7  | 10.0  | 6.5  | 120.4 | 3.523 | 2.95    | C10 H13 N4 O5 |
|          | 269.0873   | 4.0  | 14.9  | 1.5  | 122.9 | 5.973 | 0.25    | C9 H17 O9     |
|          | 269.0958   | -4.5 | -16.7 | 2.5  | 126.2 | 9.254 | 0.01    | C4 H13 N8 O6  |

Compound **3i** - ( $^1\text{H}$  NMR,  $^{13}\text{C}$  NMR, HPLC, and HRMS data charts)

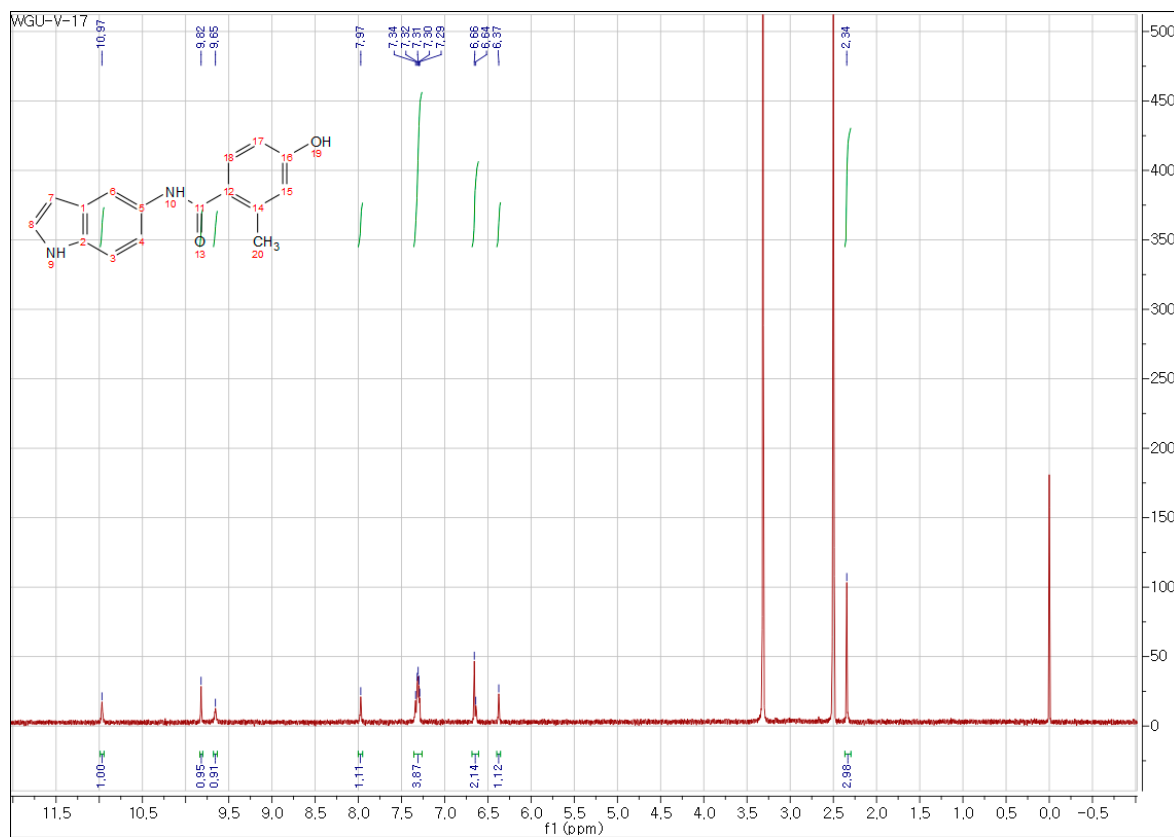

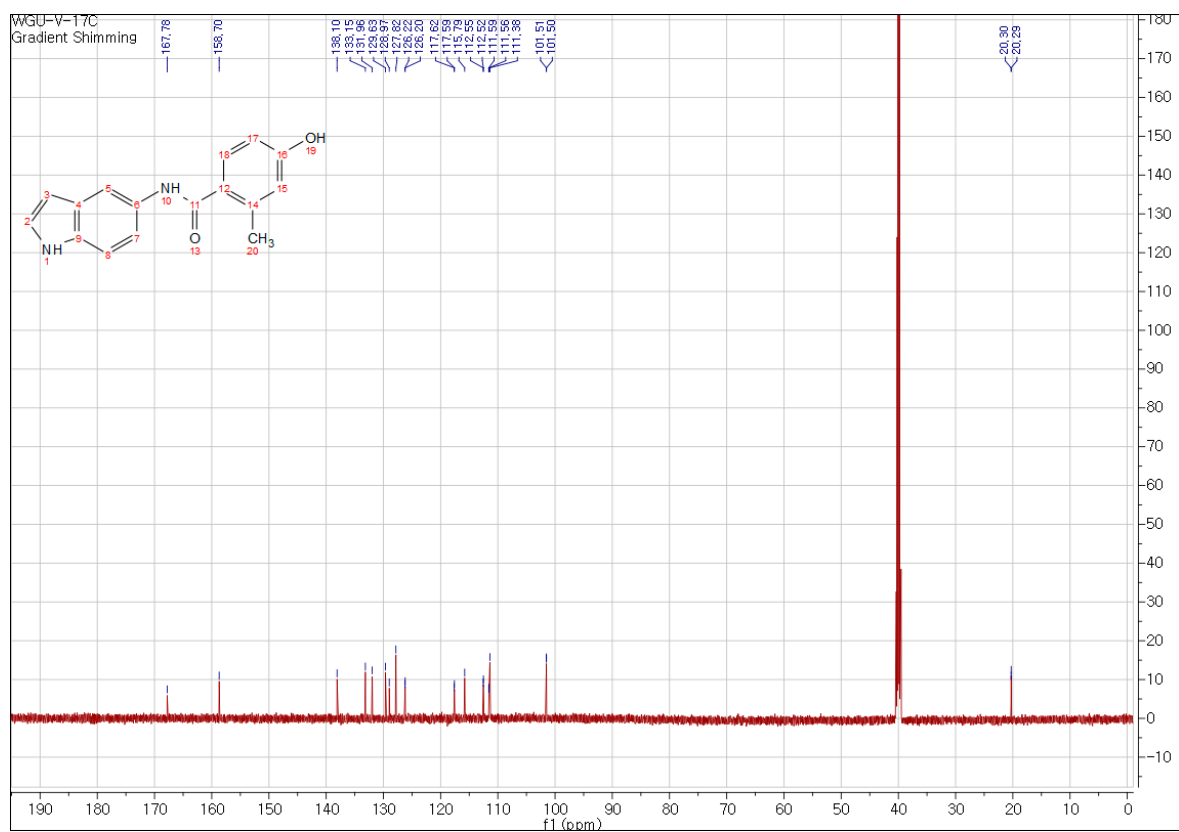

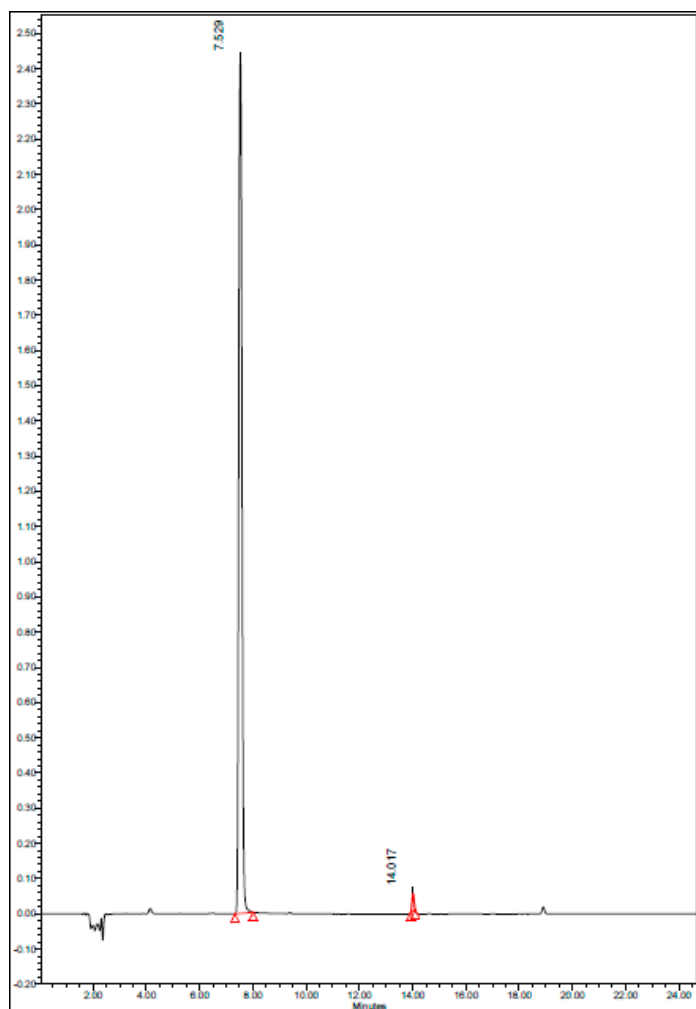

|   | Name | Retention Time (min) | Purity1 Angle | Purity1 Threshold | PDA Match1 Spect. Name | PDA Match1 Angle | PDA Match1 Threshold | PDA Match1 Lib. Name | Area (μV*sec) | % Area | Height (μV) | Int Type | Amount |
|---|------|----------------------|---------------|-------------------|------------------------|------------------|----------------------|----------------------|---------------|--------|-------------|----------|--------|
| 1 |      | 7.529                |               |                   |                        |                  |                      |                      | 20602686      | 98.76  | 2439751     | bb       |        |
| 2 |      | 14.017               |               |                   |                        |                  |                      |                      | 257769        | 1.24   | 48605       | bb       |        |

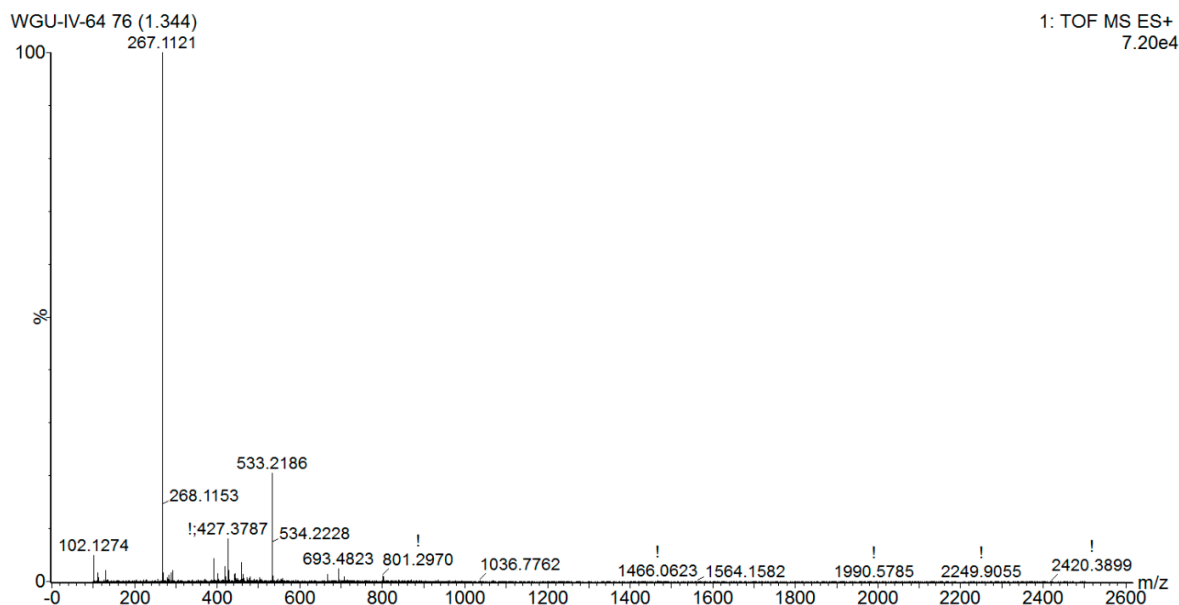

Monoisotopic Mass, Even Electron Ions  
369 formula(e) evaluated with 6 results within limits (all results (up to 1000) for each mass)  
Elements Used:  
C: 0-500 H: 0-1000 N: 0-10 O: 0-20  
WGU-IV-64 76 (1.344)  
1: TOF MS ES+

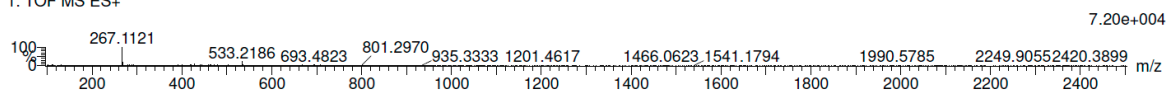

Minimum: -1.5  
Maximum: 50.0

| Mass     | Calc. Mass | mDa  | PPM   | DBE  | i-FIT | Norm   | Conf(%) | Formula       |
|----------|------------|------|-------|------|-------|--------|---------|---------------|
| 267.1121 | 267.1093   | 2.8  | 10.5  | 6.5  | 110.1 | 0.021  | 97.90   | C11 H15 N4 O4 |
|          | 267.1134   | -1.3 | -4.9  | 10.5 | 114.2 | 4.165  | 1.55    | C16 H15 N2 O2 |
|          | 267.1107   | 1.4  | 5.2   | 11.5 | 115.4 | 5.350  | 0.47    | C12 H11 N8    |
|          | 267.1080   | 4.1  | 15.3  | 1.5  | 117.3 | 7.243  | 0.07    | C10 H19 O8    |
|          | 267.1165   | -4.4 | -16.5 | 2.5  | 120.5 | 10.432 | 0.00    | C5 H15 N8 O5  |
|          | 267.1125   | -0.4 | -1.5  | -1.5 | 125.4 | 15.389 | 0.00    | H15 N10 O7    |

Compound **3j** - ( $^1\text{H}$  NMR,  $^{13}\text{C}$  NMR, HPLC, and HRMS data charts)

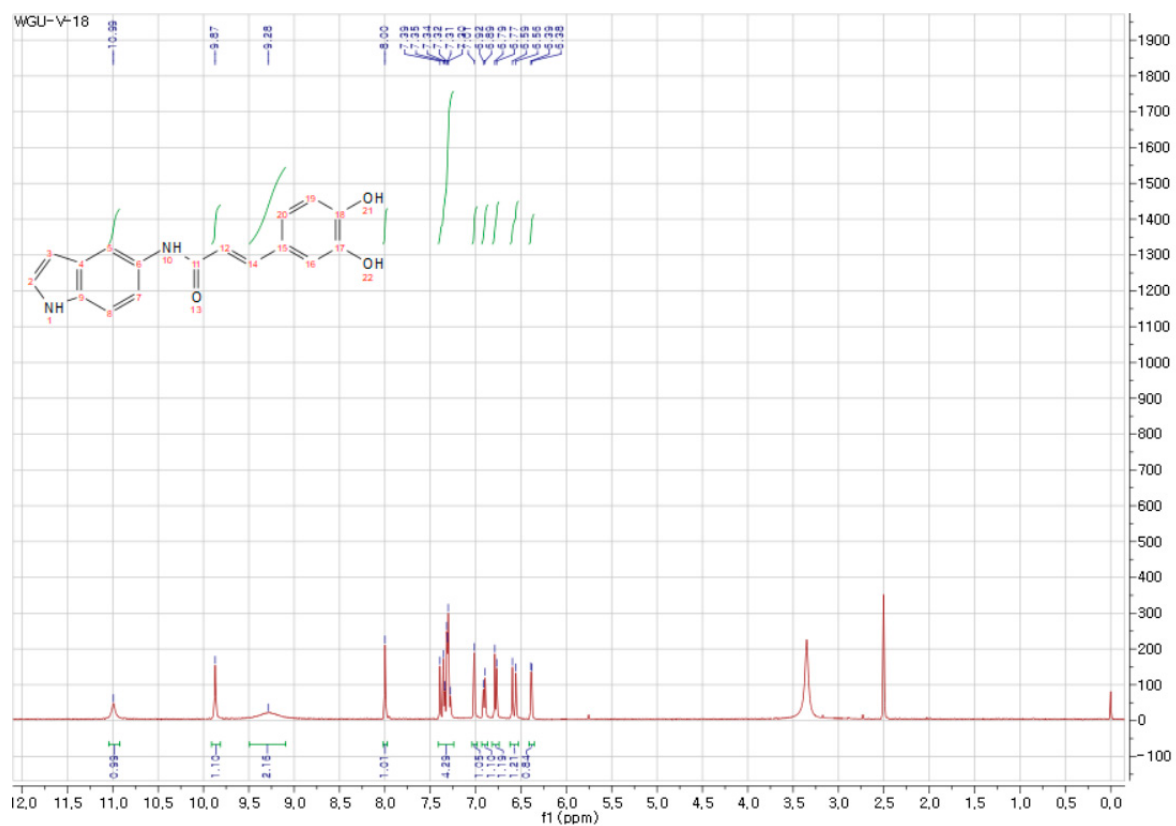

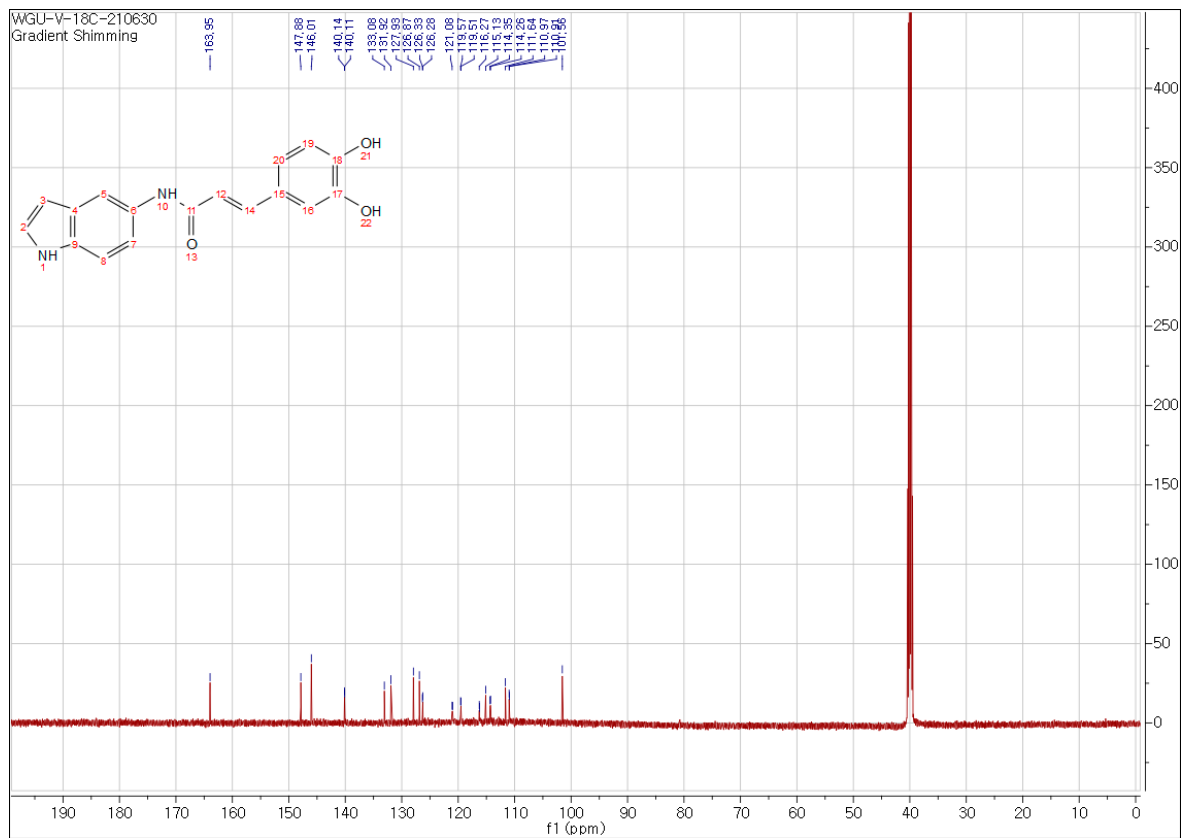

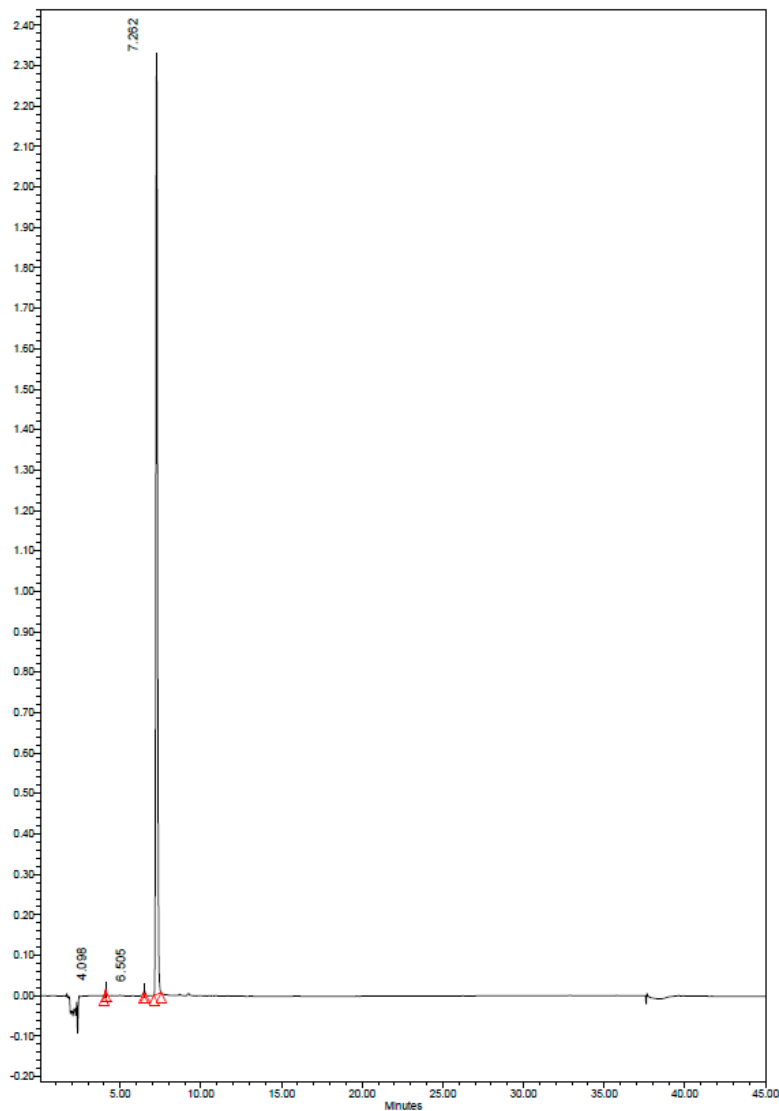

| Name | Retention Time (min) | Purity1 Angle | Purity1 Threshold | PDA Match1 Spect. Name | PDA Match1 Angle | PDA Match1 Threshold | PDA Match1 Lib. Name | Area (μV*sec) | % Area | Height (μV) | Int Type | Amount |
|------|----------------------|---------------|-------------------|------------------------|------------------|----------------------|----------------------|---------------|--------|-------------|----------|--------|
| 1    | 4.098                |               |                   |                        |                  |                      |                      | 41532         | 0.24   | 9318        | bb       |        |
| 2    | 6.505                |               |                   |                        |                  |                      |                      | 30212         | 0.17   | 7076        | bb       |        |
| 3    | 7.262                |               |                   |                        |                  |                      |                      | 17438940      | 99.59  | 2321530     | bb       |        |

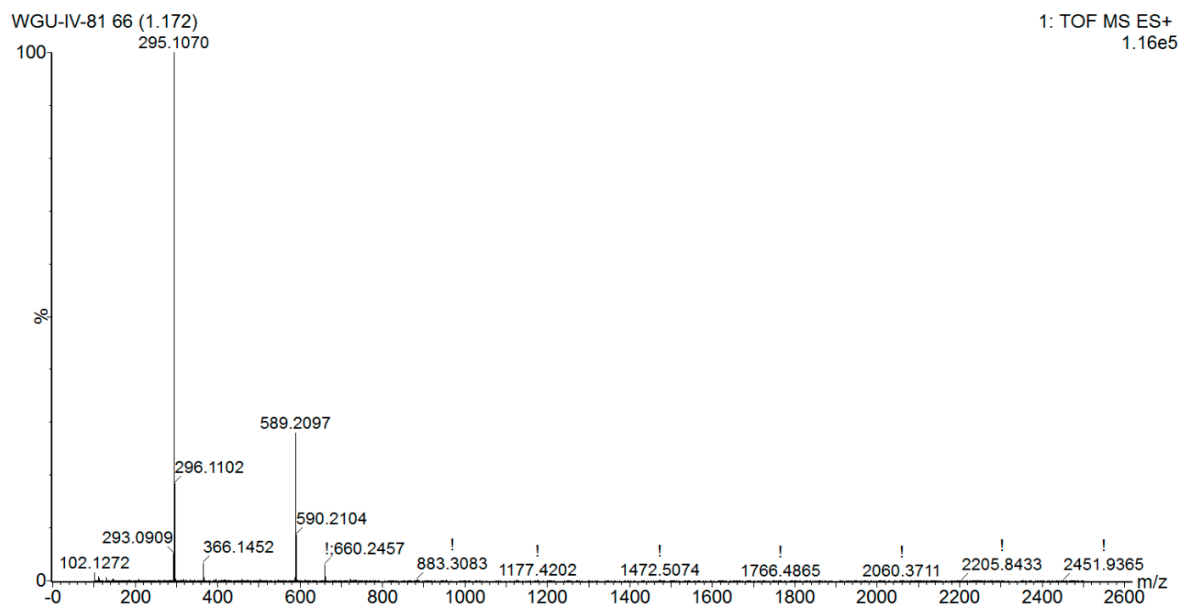

Monoisotopic Mass, Even Electron Ions  
 445 formula(e) evaluated with 7 results within limits (all results (up to 1000) for each mass)  
 Elements Used:  
 C: 0-500 H: 0-1000 N: 0-10 O: 0-20  
 WGU-IV-81 66 (1.172)  
 1: TOF MS ES+

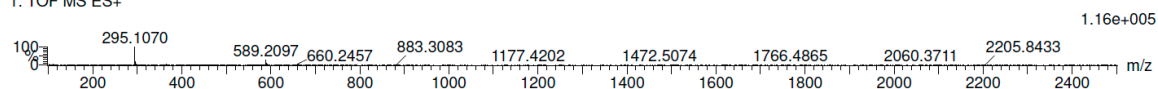

Minimum: -1.5  
 Maximum: 5.0 10.0 50.0

| Mass     | Calc. Mass | mDa  | PPM   | DBE  | i-FIT | Norm   | Conf(%) | Formula       |
|----------|------------|------|-------|------|-------|--------|---------|---------------|
| 295.1070 | 295.1083   | -1.3 | -4.4  | 11.5 | 127.9 | 0.007  | 99.32   | C17 H15 N2 O3 |
|          | 295.1056   | 1.4  | 4.7   | 12.5 | 133.0 | 5.184  | 0.56    | C13 H11 N8 O  |
|          | 295.1042   | 2.8  | 9.5   | 7.5  | 134.7 | 6.803  | 0.11    | C12 H15 N4 O5 |
|          | 295.1029   | 4.1  | 13.9  | 2.5  | 137.8 | 9.931  | 0.00    | C11 H19 O9    |
|          | 295.1101   | -3.1 | -10.5 | -1.5 | 140.8 | 12.957 | 0.00    | C5 H19 N4 O10 |
|          | 295.1115   | -4.5 | -15.2 | 3.5  | 141.2 | 13.314 | 0.00    | C6 H15 N8 O6  |
|          | 295.1074   | -0.4 | -1.4  | -0.5 | 145.7 | 17.810 | 0.00    | C H15 N10 O8  |

Compound **3k** - (<sup>1</sup>H NMR, <sup>13</sup>C NMR, HPLC, and HRMS data charts)

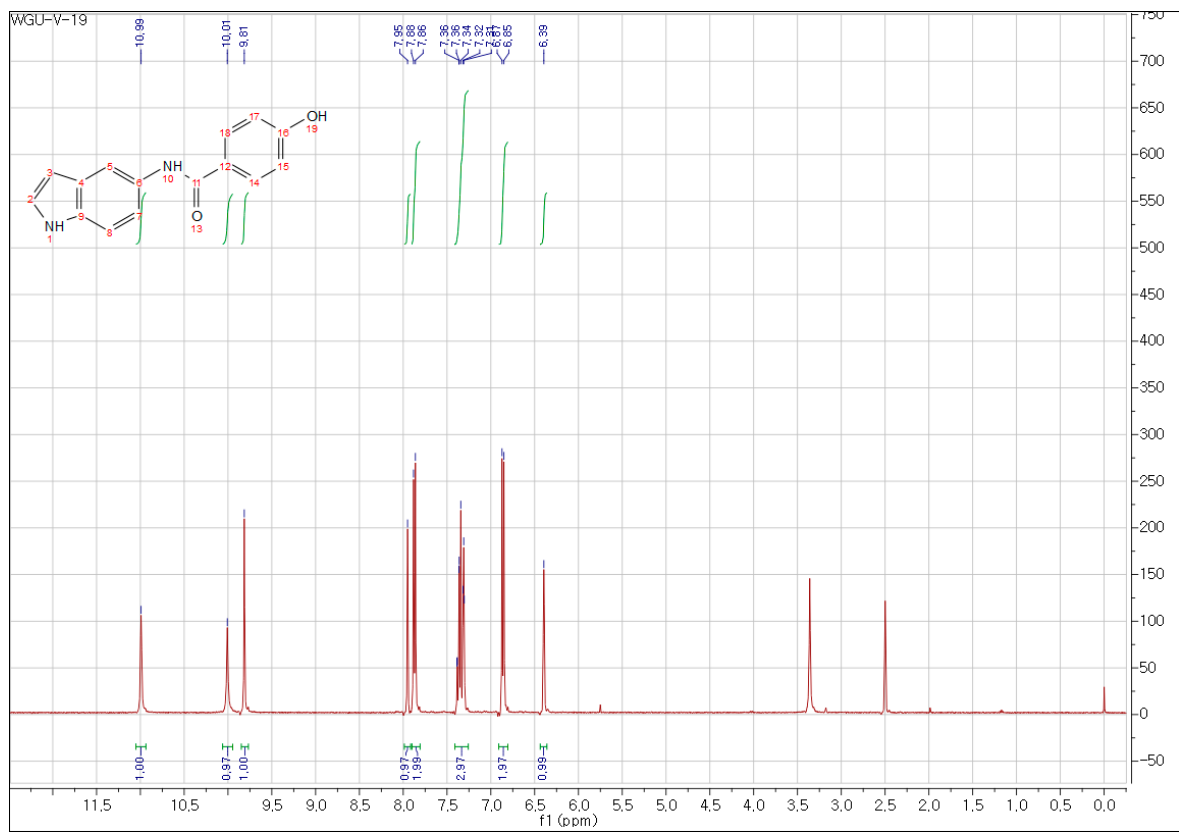

WGU-V-19C-210628  
Gradient Shimming

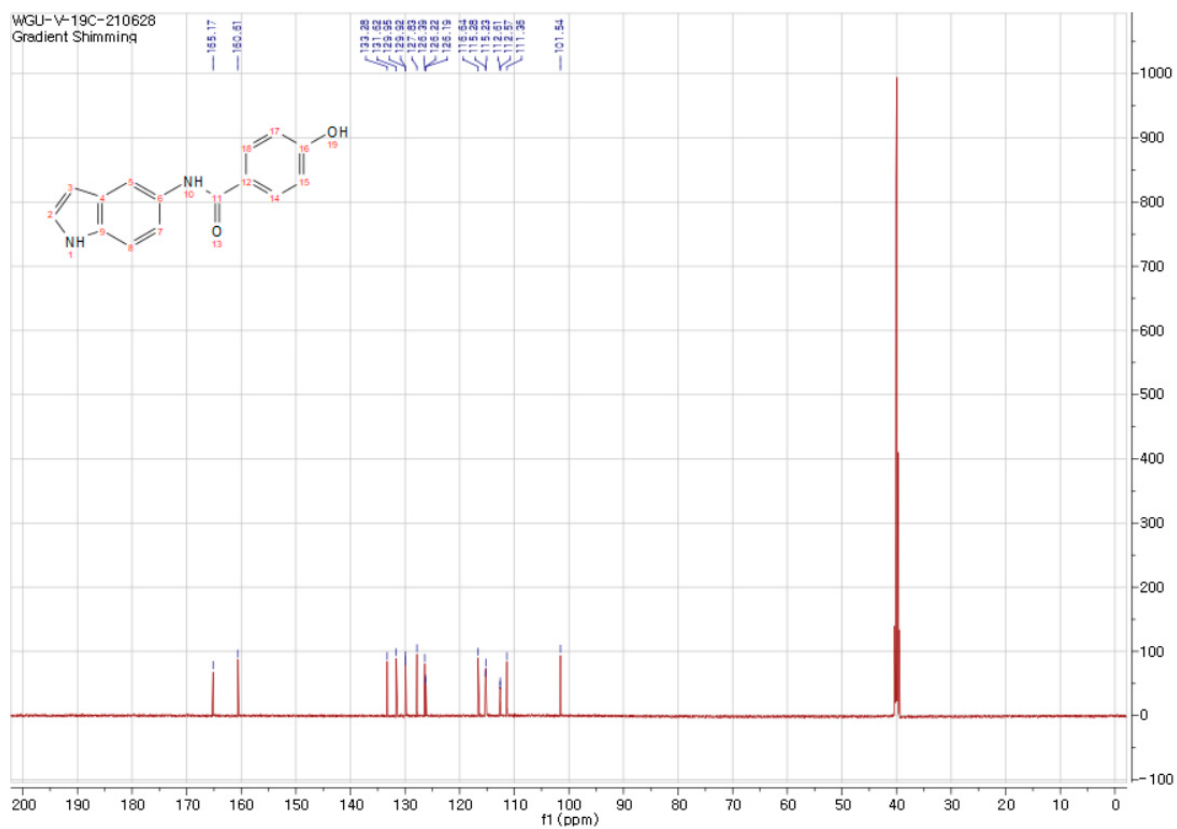

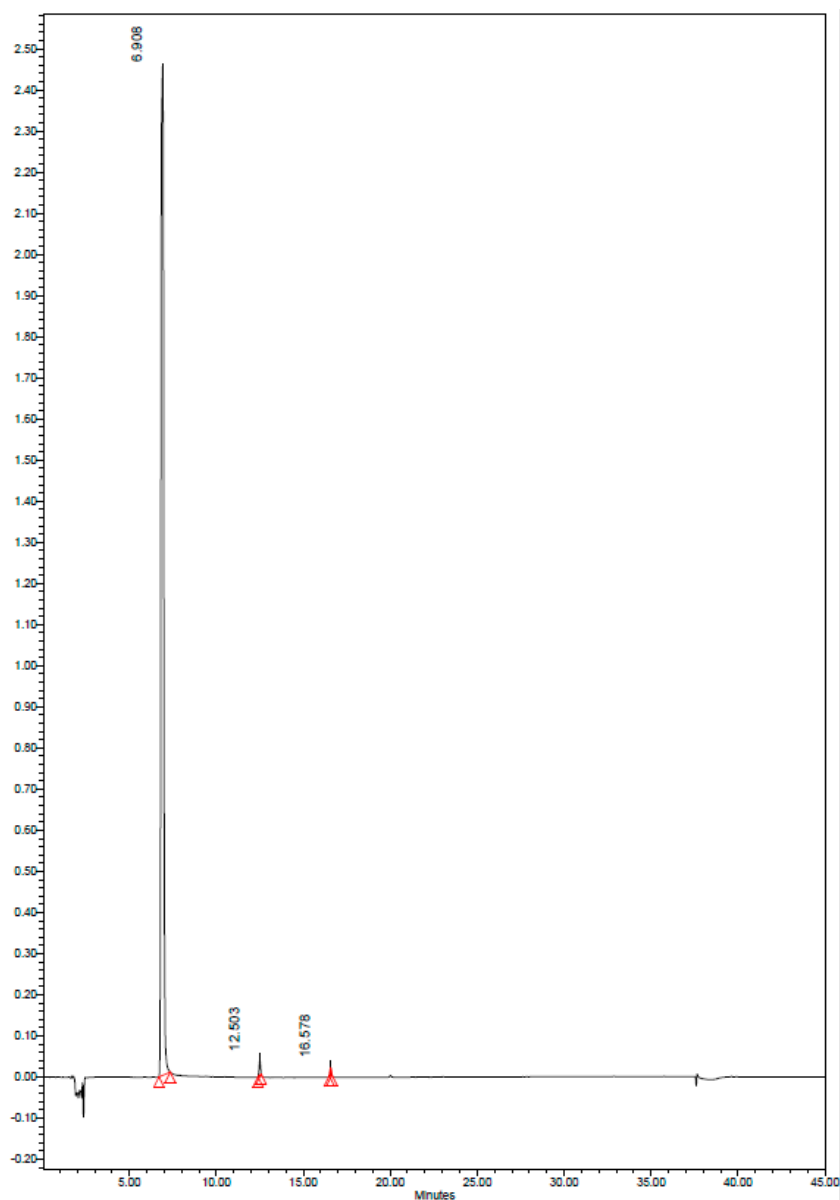

| Name | Retention Time (min) | Purity1 Angle | Purity1 Threshold | PDA Match1 Spect. Name | PDA Match1 Angle | PDA Match1 Threshold | PDA Match1 Lib. Name | Area (μV*sec) | % Area | Height (μV) | Int Type | Amount |
|------|----------------------|---------------|-------------------|------------------------|------------------|----------------------|----------------------|---------------|--------|-------------|----------|--------|
| 1    | 6.908                |               |                   |                        |                  |                      |                      | 26532338      | 98.94  | 2471560     | bb       |        |
| 2    | 12.503               |               |                   |                        |                  |                      |                      | 192085        | 0.72   | 35261       | bb       |        |
| 3    | 16.578               |               |                   |                        |                  |                      |                      | 91631         | 0.34   | 18319       | bb       |        |

WGU-V-19 102 (1.806)  
1: TOF MS ES+

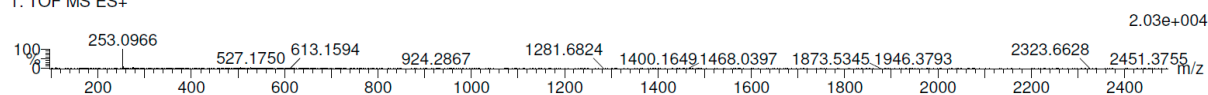

Minimum: -1.5  
Maximum: 5.0 10.0 50.0

| Mass     | Calc. Mass | mDa  | PPM  | DBE  | i-FIT | Norm  | Conf(%) | Formula       |
|----------|------------|------|------|------|-------|-------|---------|---------------|
| 253.0966 | 253.0977   | -1.1 | -4.3 | 10.5 | 41.5  | 0.660 | 51.71   | C15 H13 N2 O2 |
|          | 253.0950   | 1.6  | 6.3  | 11.5 | 41.6  | 0.728 | 48.29   | C11 H9 N8     |

Compound **3I** - ( $^1\text{H}$  NMR,  $^{13}\text{C}$  NMR, HPLC, and HRMS data charts)

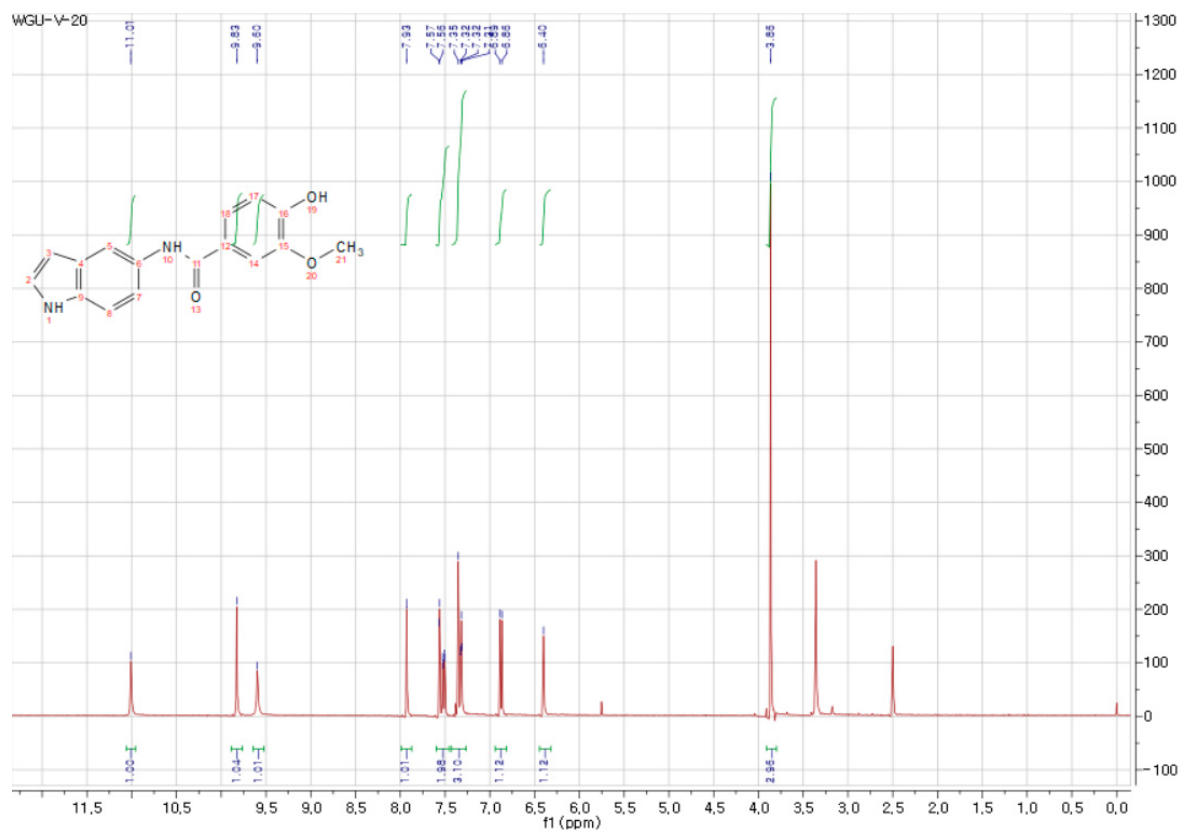

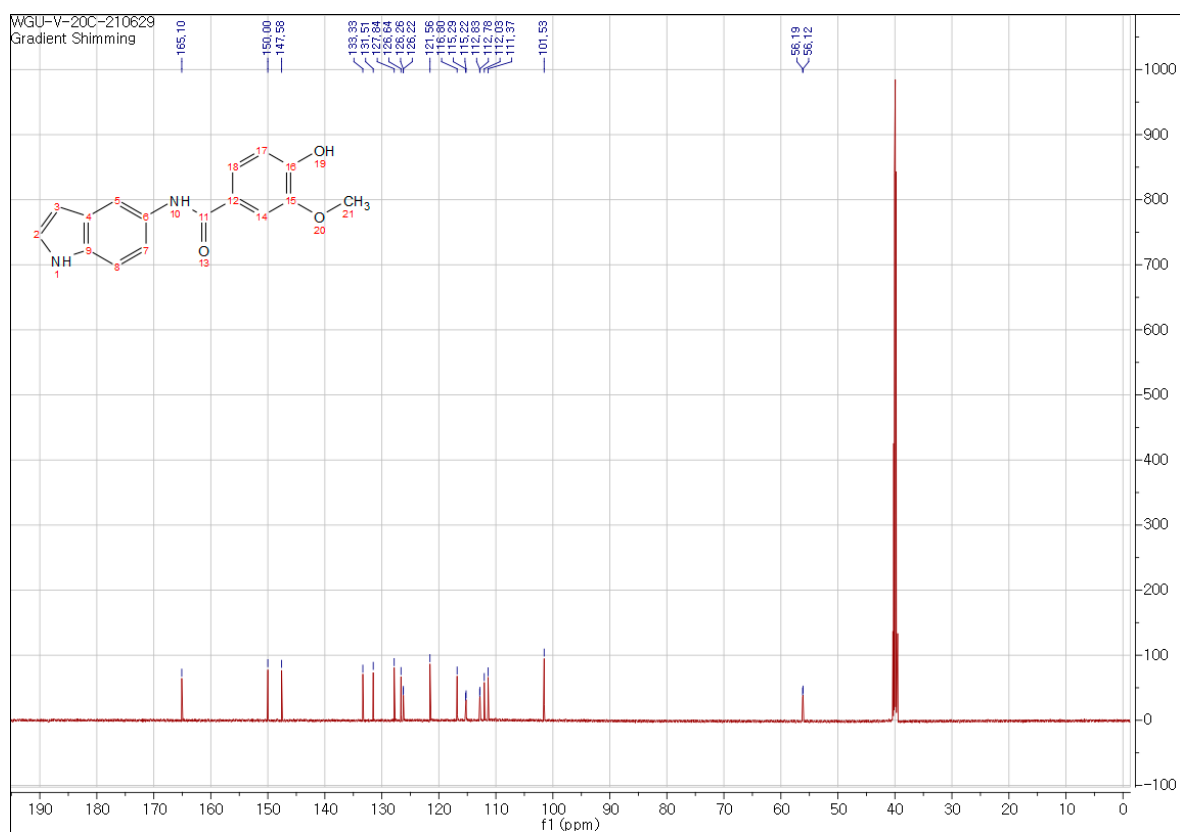

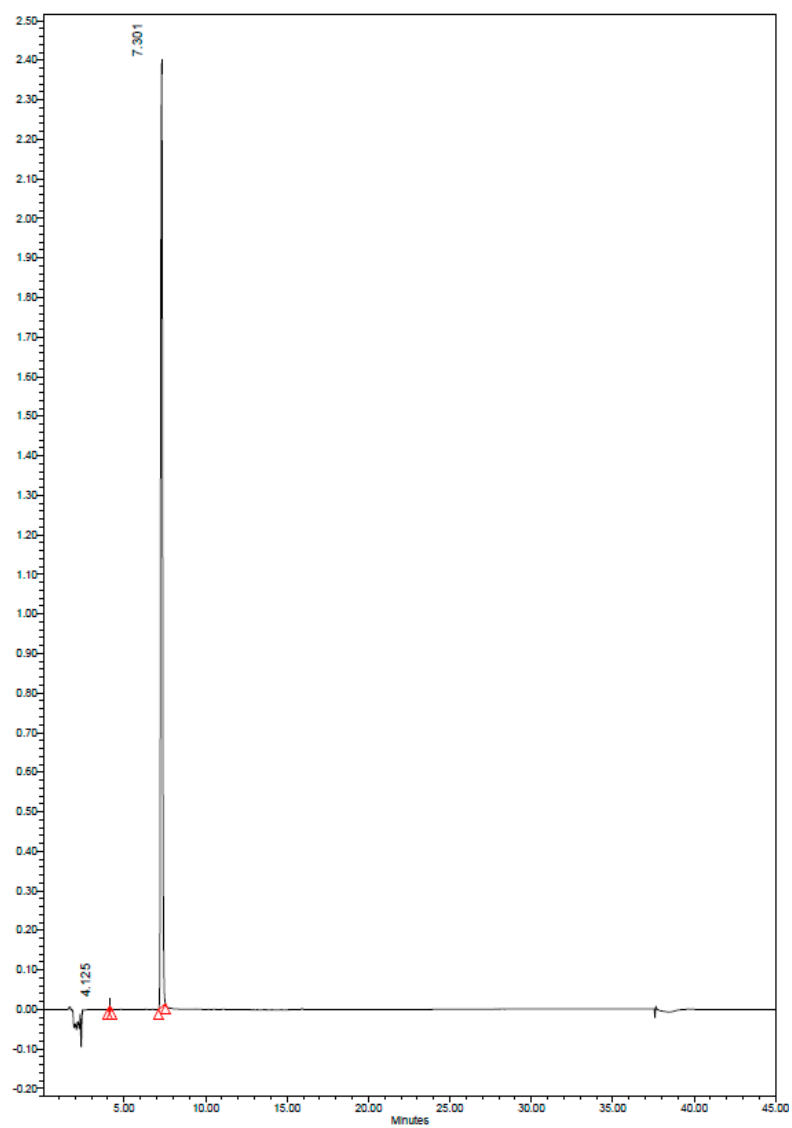

|   | Name | Retention Time (min) | Purity1 Angle | Purity1 Threshold | PDA Match1 Spect. Name | PDA Match1 Angle | PDA Match1 Threshold | PDA Match1 Lib. Name | Area (μV*sec) | % Area | Height (μV) | Int Type | Amount |
|---|------|----------------------|---------------|-------------------|------------------------|------------------|----------------------|----------------------|---------------|--------|-------------|----------|--------|
| 1 |      | 4.125                |               |                   |                        |                  |                      |                      | 48418         | 0.25   | 7272        | bb       |        |
| 2 |      | 7.301                |               |                   |                        |                  |                      |                      | 18976963      | 99.75  | 2397016     | bb       |        |

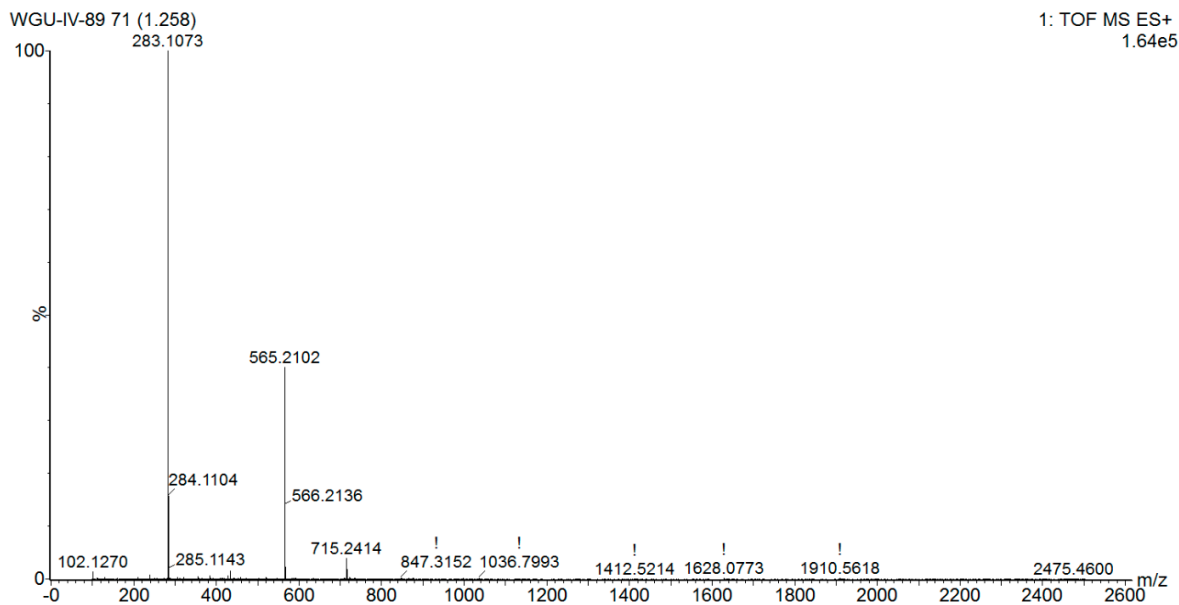

Monoisotopic Mass, Even Electron Ions

413 formula(e) evaluated with 7 results within limits (all results (up to 1000) for each mass)

Elements Used:

C: 0-500 H: 0-1000 N: 0-10 O: 0-20

WGU-IV-89 71 (1.258)

1: TOF MS ES+

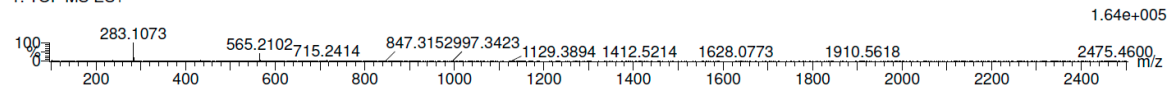

Minimum: -1.5  
Maximum: 5.0 10.0 50.0

| Mass     | Calc. Mass | mDa  | PPM   | DBE  | i-FIT | Norm   | Conf(%) | Formula       |
|----------|------------|------|-------|------|-------|--------|---------|---------------|
| 283.1073 | 283.1056   | 1.7  | 6.0   | 11.5 | 201.3 | 0.544  | 58.07   | C12 H11 N8 O  |
|          | 283.1083   | -1.0 | -3.5  | 10.5 | 202.0 | 1.277  | 27.88   | C16 H15 N2 O3 |
|          | 283.1042   | 3.1  | 10.9  | 6.5  | 202.8 | 2.065  | 12.69   | C11 H15 N4 O5 |
|          | 283.1123   | -5.0 | -17.7 | 14.5 | 205.2 | 4.492  | 1.12    | C21 H15 O     |
|          | 283.1029   | 4.4  | 15.5  | 1.5  | 206.9 | 6.114  | 0.22    | C10 H19 O9    |
|          | 283.1115   | -4.2 | -14.8 | 2.5  | 209.0 | 8.302  | 0.02    | C5 H15 N8 O6  |
|          | 283.1074   | -0.1 | -0.4  | -1.5 | 213.3 | 12.549 | 0.00    | H15 N10 O8    |

Compound **3m** - ( $^1\text{H}$  NMR,  $^{13}\text{C}$  NMR, HPLC, and HRMS data charts)

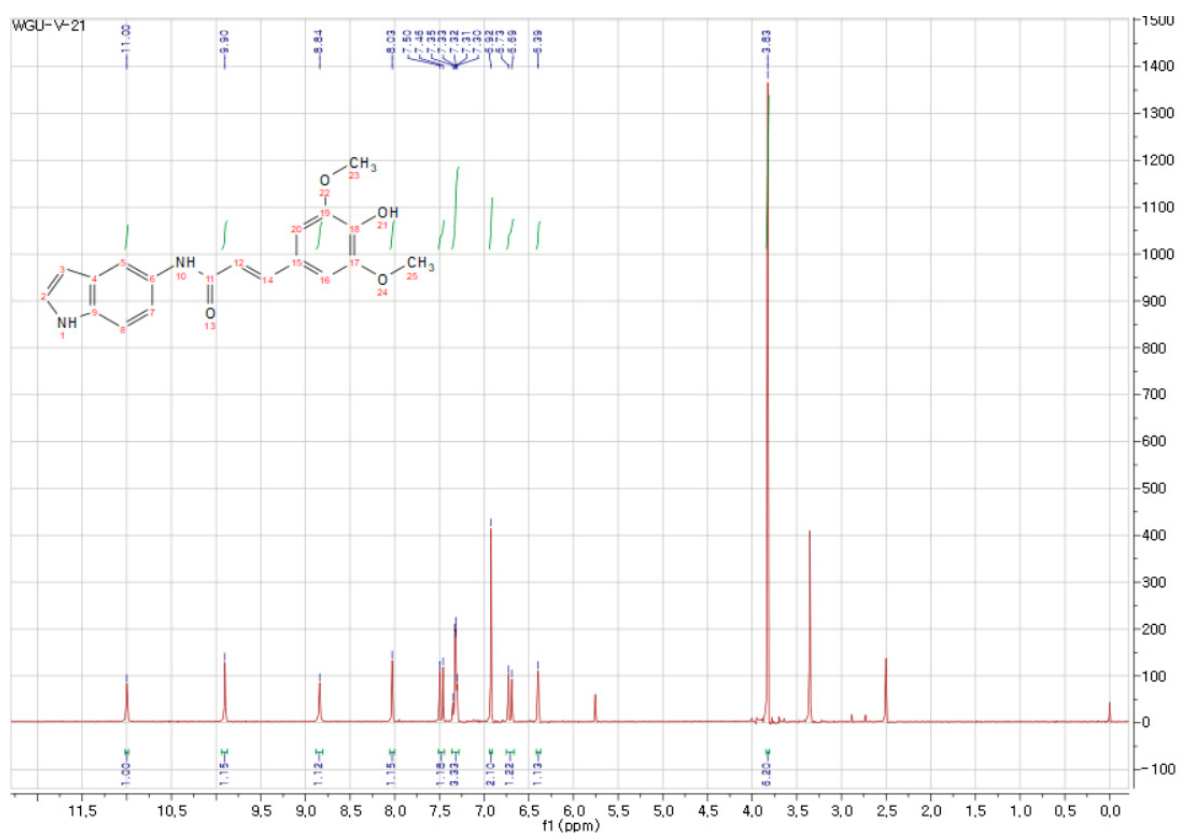

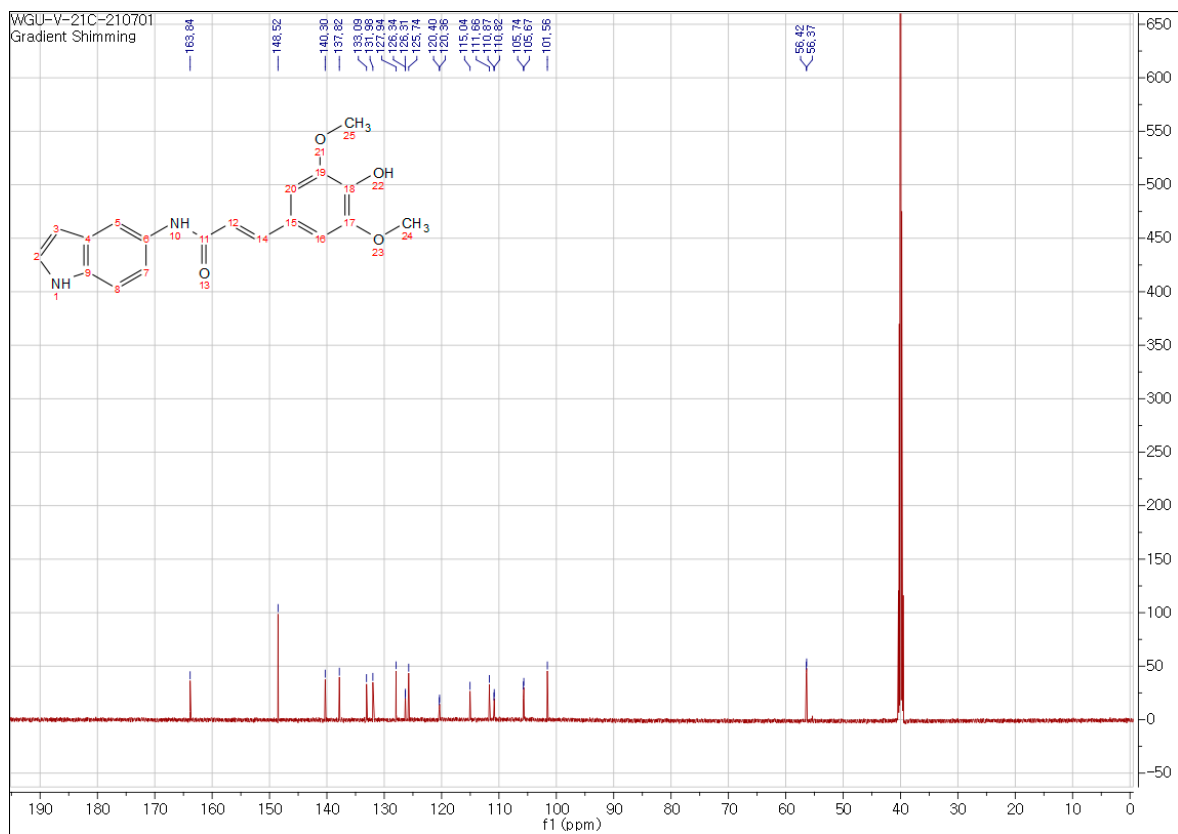

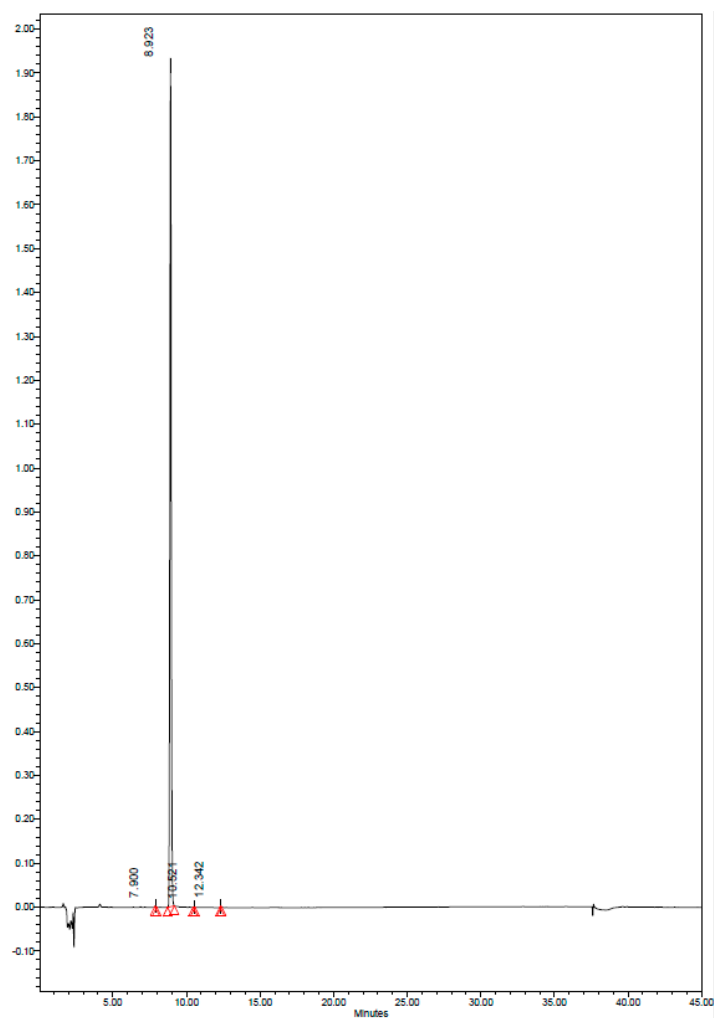

|   | Name | Retention Time (min) | Purity1 Angle | Purity1 Threshold | PDA Match1 Spect. Name | PDA Match1 Angle | PDA Match1 Threshold | PDA Match1 Lib. Name | Area (μV*sec) | % Area | Height (μV) | Int Type | Amount |
|---|------|----------------------|---------------|-------------------|------------------------|------------------|----------------------|----------------------|---------------|--------|-------------|----------|--------|
| 1 |      | 7.900                |               |                   |                        |                  |                      |                      | 8997          | 0.07   | 2039        | bb       |        |
| 2 |      | 8.923                |               |                   |                        |                  |                      |                      | 12659576      | 99.88  | 1925922     | bb       |        |
| 3 |      | 10.521               |               |                   |                        |                  |                      |                      | 1724          | 0.01   | 375         | bb       |        |
| 4 |      | 12.342               |               |                   |                        |                  |                      |                      | 5023          | 0.04   | 1363        | bb       |        |

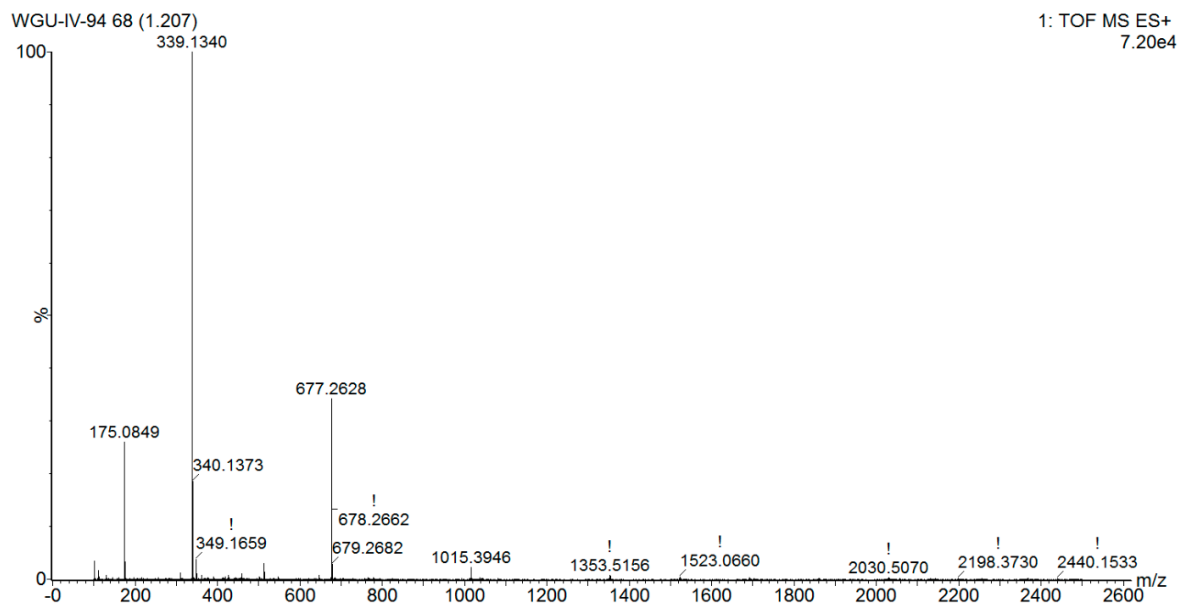

Monoisotopic Mass, Even Electron Ions  
579 formula(e) evaluated with 9 results within limits (all results (up to 1000) for each mass)  
Elements Used:  
C: 0-500 H: 0-1000 N: 0-10 O: 0-20  
WGU-IV-94 68 (1.207)  
1: TOF MS ES+

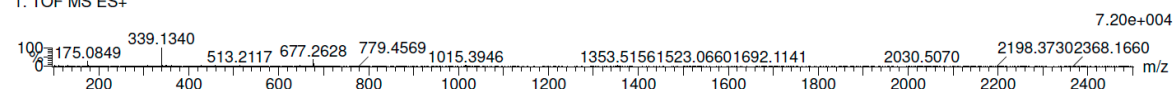

|          |            |      |       |      |       |        |         |               |  |
|----------|------------|------|-------|------|-------|--------|---------|---------------|--|
| Minimum: |            |      |       | -1.5 |       |        |         |               |  |
| Maximum: |            | 5.0  | 10.0  | 50.0 |       |        |         |               |  |
| Mass     | Calc. Mass | mDa  | PPM   | DBE  | i-FIT | Norm   | Conf(%) | Formula       |  |
| 339.1340 | 339.1345   | -0.5 | -1.5  | 11.5 | 96.4  | 0.658  | 51.78   | C19 H19 N2 O4 |  |
|          | 339.1305   | 3.5  | 10.3  | 7.5  | 96.9  | 1.120  | 32.62   | C14 H19 N4 O6 |  |
|          | 339.1318   | 2.2  | 6.5   | 12.5 | 97.9  | 2.142  | 11.75   | C15 H15 N8 O2 |  |
|          | 339.1358   | -1.8 | -5.3  | 16.5 | 99.4  | 3.610  | 2.71    | C20 H15 N6    |  |
|          | 339.1385   | -4.5 | -13.3 | 15.5 | 101.0 | 5.182  | 0.56    | C24 H19 O2    |  |
|          | 339.1291   | 4.9  | 14.4  | 2.5  | 101.0 | 5.242  | 0.53    | C13 H23 O10   |  |
|          | 339.1377   | -3.7 | -10.9 | 3.5  | 103.9 | 8.146  | 0.03    | C8 H19 N8 O7  |  |
|          | 339.1363   | -2.3 | -6.8  | -1.5 | 104.5 | 8.703  | 0.02    | C7 H23 N4 O11 |  |
|          | 339.1336   | 0.4  | 1.2   | -0.5 | 107.1 | 11.361 | 0.00    | C3 H19 N10 O9 |  |
